# Supplementary material
Source: publisher figshare collection journal article supplement (https://gsajournals.figshare.com/ndownloader/files/30688418)
Supplement: Supplementary file 1 [file 30688418]

## Sheet: O157H7_Up_4 HPI
Dataset S10. Overrepresented gene ontology terms from up and downregulated genes that overlap between Arabidopsis and lettuce plants inoculated with 1 x 109 CFU/mL of Escherichia coli O157:H7 or Salmonella enterica Typhimurium 14028s at 4 and 24 hours post inoculation (HPI).
Shared							Arabidopsis Specific							Lettuce Specific
ALL GO TERMS							ALL GO TERMS							ALL GO TERMS
Analysis Type:	PANTHER Overrepresentation Test (Released 20190711)						Analysis Type:	PANTHER Overrepresentation Test (Released 20190711)						Analysis Type:	PANTHER Overrepresentation Test (Released 20190711)
Annotation Version and Release Date:	GO Ontology database Released 2019-12-09						Annotation Version and Release Date:	GO Ontology database Released 2019-12-09						Annotation Version and Release Date:	GO Ontology database Released 2019-12-09
Analyzed List:	upload_1 (Arabidopsis thaliana)						Analyzed List:	upload_1 (Arabidopsis thaliana)						Analyzed List:	upload_1 (Arabidopsis thaliana)
Reference List:	Arabidopsis thaliana (all genes in database)						Reference List:	Arabidopsis thaliana (all genes in database)						Reference List:	Arabidopsis thaliana (all genes in database)
Test Type:	FISHER						Test Type:	FISHER						Test Type:	FISHER
Correction:	BONFERRONI						Correction:	BONFERRONI						Correction:	BONFERRONI
Bonferroni count:	2757						Bonferroni count:	2757						Bonferroni count:	2757
GO biological process complete	Arabidopsis thaliana - REFLIST (27416)	upload_1 (107)	upload_1 (expected)	upload_1 (over/under)	upload_1 (fold Enrichment)	upload_1 (P-value)	GO biological process complete	Arabidopsis thaliana - REFLIST (27416)	upload_1 (2010)	upload_1 (expected)	upload_1 (over/under)	upload_1 (fold Enrichment)	upload_1 (P-value)	GO biological process complete	Arabidopsis thaliana - REFLIST (27416)	upload_1 (342)	upload_1 (expected)	upload_1 (over/under)	upload_1 (fold Enrichment)	upload_1 (P-value)
cellular response to chemical stimulus (GO:0070887)	1128	17	4.4	+	3.86	0.00556	activation of immune response (GO:0002253)	62	20	4.55	+	4.4	0.00126	amide biosynthetic process (GO:0043604)	502	36	6.26	+	5.75	5.39e-13
cellular response to stimulus (GO:0051716)	2416	25	9.43	+	2.65	0.0153	activation of innate immune response (GO:0002218)	61	20	4.47	+	4.47	0.00101	biosynthetic process (GO:0009058)	2441	66	30.45	+	2.17	8.75e-06
cellular response to stress (GO:0033554)	1139	18	4.45	+	4.05	0.00136	biological regulation (GO:0065007)	5644	531	413.79	+	1.28	4.6e-06	cellular amide metabolic process (GO:0043603)	642	39	8.01	+	4.87	4.96e-12
cellular response to topologically incorrect protein (GO:0035967)	74	5	0.29	+	17.31	0.04	cell communication (GO:0007154)	1560	222	114.37	+	1.94	2.01e-15	cellular aromatic compound metabolic process (GO:0006725)	2380	67	29.69	+	2.26	1.39e-06
cellular response to unfolded protein (GO:0034620)	51	5	0.2	+	25.12	0.00727	cellular metabolic process (GO:0044237)	6800	587	498.54	+	1.18	0.043	cellular biosynthetic process (GO:0044249)	2262	64	28.22	+	2.27	3.74e-06
'de novo' protein folding (GO:0006458)	57	5	0.22	+	22.48	0.0121	cellular process (GO:0009987)	10043	942	736.3	+	1.28	4.59e-16	cellular component biogenesis (GO:0044085)	1167	58	14.56	+	3.98	2.56e-15
defense response (GO:0006952)	1005	15	3.92	+	3.82	0.0265	cellular protein metabolic process (GO:0044267)	2699	271	197.88	+	1.37	0.00132	cellular component organization or biogenesis (GO:0071840)	2822	84	35.2	+	2.39	2.33e-10
defense response to other organism (GO:0098542)	764	14	2.98	+	4.7	0.00547	cellular protein modification process (GO:0006464)	1891	222	138.64	+	1.6	1.86e-07	cellular macromolecule biosynthetic process (GO:0034645)	1018	39	12.7	+	3.07	3.36e-06
endoplasmic reticulum unfolded protein response (GO:0030968)	36	5	0.14	+	35.59	0.00149	cellular response to chemical stimulus (GO:0070887)	1128	191	82.7	+	2.31	4.56e-20	cellular metabolic process (GO:0044237)	6800	132	84.83	+	1.56	6.59e-05
protein folding (GO:0006457)	169	10	0.66	+	15.16	5.91e-06	cellular response to decreased oxygen levels (GO:0036294)	236	88	17.3	+	5.09	1.58e-26	cellular nitrogen compound biosynthetic process (GO:0044271)	1022	44	12.75	+	3.45	6.78e-09
response to abiotic stimulus (GO:0009628)	2062	26	8.05	+	3.23	0.000225	cellular response to ethylene stimulus (GO:0071369)	103	24	7.55	+	3.18	0.0132	cellular nitrogen compound metabolic process (GO:0034641)	2671	91	33.32	+	2.73	2.64e-15
response to bacterium (GO:0009617)	477	11	1.86	+	5.91	0.00899	cellular response to hypoxia (GO:0071456)	234	87	17.16	+	5.07	3.97e-26	cellular process (GO:0009987)	10043	178	125.28	+	1.42	2.58e-05
response to biotic stimulus (GO:0009607)	1022	17	3.99	+	4.26	0.00147	cellular response to oxygen levels (GO:0071453)	236	88	17.3	+	5.09	1.58e-26	gene expression (GO:0010467)	1403	69	17.5	+	3.94	1.22e-18
response to chemical (GO:0042221)	2661	42	10.39	+	4.04	1.61e-12	cellular response to stimulus (GO:0051716)	2416	370	177.13	+	2.09	2.22e-34	heterocycle metabolic process (GO:0046483)	2256	57	28.14	+	2.03	0.00145
response to chitin (GO:0010200)	137	10	0.53	+	18.7	8.63e-07	cellular response to stress (GO:0033554)	1139	203	83.51	+	2.43	5.18e-24	macromolecule biosynthetic process (GO:0009059)	1062	40	13.25	+	3.02	3.24e-06
response to drug (GO:0042493)	501	18	1.96	+	9.21	4.62e-09	defense response (GO:0006952)	1005	199	73.68	+	2.7	1.2e-28	macromolecule metabolic process (GO:0043170)	4696	101	58.58	+	1.72	5.65e-05
response to endoplasmic reticulum stress (GO:0034976)	97	7	0.38	+	18.49	0.000473	defense response to bacterium (GO:0042742)	394	90	28.89	+	3.12	6.98e-15	maturation of LSU-rRNA (GO:0000470)	46	9	0.57	+	15.68	6.27e-05
response to external biotic stimulus (GO:0043207)	1021	17	3.98	+	4.27	0.00145	defense response to fungus (GO:0050832)	244	52	17.89	+	2.91	8.43e-07	maturation of LSU-rRNA from tricistronic rRNA transcript (SSU-rRNA, 5.8S rRNA, LSU-rRNA) (GO:0000463)	18	6	0.22	+	26.72	0.00103
response to external stimulus (GO:0009605)	1424	19	5.56	+	3.42	0.0076	defense response to other organism (GO:0098542)	764	163	56.01	+	2.91	8.15e-26	maturation of SSU-rRNA (GO:0030490)	52	10	0.65	+	15.42	1.19e-05
response to heat (GO:0009408)	205	8	0.8	+	10	0.00526	defense response, incompatible interaction (GO:0009814)	174	38	12.76	+	2.98	0.000114	maturation of SSU-rRNA from tricistronic rRNA transcript (SSU-rRNA, 5.8S rRNA, LSU-rRNA) (GO:0000462)	35	7	0.44	+	16.03	0.00208
response to nitrogen compound (GO:1901698)	291	14	1.14	+	12.33	4.16e-08	immune response (GO:0006955)	304	73	22.29	+	3.28	1.23e-12	metabolic process (GO:0008152)	7731	146	96.44	+	1.51	4.11e-05
response to organic substance (GO:0010033)	1712	25	6.68	+	3.74	2.52e-05	immune response-activating signal transduction (GO:0002757)	15	9	1.1	+	8.18	0.0447	ncRNA metabolic process (GO:0034660)	407	33	5.08	+	6.5	3.76e-13
response to organonitrogen compound (GO:0010243)	242	13	0.94	+	13.76	6.29e-08	immune response-regulating signaling pathway (GO:0002764)	16	10	1.17	+	8.52	0.0115	ncRNA processing (GO:0034470)	344	31	4.29	+	7.22	2.17e-13
response to other organism (GO:0051707)	1021	17	3.98	+	4.27	0.00145	immune system process (GO:0002376)	372	95	27.27	+	3.48	1.16e-18	nitrogen compound metabolic process (GO:0006807)	5422	117	67.64	+	1.73	1.5e-06
response to oxygen-containing compound (GO:1901700)	1504	25	5.87	+	4.26	1.9e-06	indole-containing compound biosynthetic process (GO:0042435)	49	16	3.59	+	4.45	0.0153	nucleic acid metabolic process (GO:0090304)	1629	49	20.32	+	2.41	8.08e-05
response to ozone (GO:0010193)	33	4	0.13	+	31.06	0.0356	indole-containing compound metabolic process (GO:0042430)	71	22	5.21	+	4.23	0.000605	nucleobase-containing compound metabolic process (GO:0006139)	1966	54	24.52	+	2.2	0.000217
response to stimulus (GO:0050896)	5327	60	20.79	+	2.89	1.83e-13	induced systemic resistance (GO:0009682)	30	13	2.2	+	5.91	0.00981	organelle assembly (GO:0070925)	175	16	2.18	+	7.33	6.14e-06
response to stress (GO:0006950)	3079	47	12.02	+	3.91	4.31e-14	innate immune response (GO:0045087)	300	73	21.99	+	3.32	6.77e-13	organic cyclic compound metabolic process (GO:1901360)	2471	69	30.82	+	2.24	8.8e-07
response to temperature stimulus (GO:0009266)	579	12	2.26	+	5.31	0.0092	innate immune response-activating signal transduction (GO:0002758)	14	9	1.03	+	8.77	0.0297	organic substance biosynthetic process (GO:1901576)	2296	65	28.64	+	2.27	2.56e-06
response to unfolded protein (GO:0006986)	51	5	0.2	+	25.12	0.00727	intracellular signal transduction (GO:0035556)	465	71	34.09	+	2.08	0.000241	organic substance metabolic process (GO:0071704)	6774	134	84.5	+	1.59	1.37e-05
Unclassified (UNCLASSIFIED)	6685	19	26.09	-	0.73	0	macromolecule modification (GO:0043412)	2295	228	168.26	+	1.36	0.0266	organonitrogen compound biosynthetic process (GO:1901566)	1157	46	14.43	+	3.19	2.82e-08
CHILD GO TERMS REPRESENTING HIERARCHICAL CATEGORIES							metabolic process (GO:0008152)	7731	671	566.8	+	1.18	0.00277	peptide biosynthetic process (GO:0043043)	436	35	5.44	+	6.44	5.72e-14
'de novo' protein folding (GO:0006458)	57	5	0.22	+	22.48	0.0121	multi-organism process (GO:0051704)	1495	256	109.61	+	2.34	9.68e-29	peptide metabolic process (GO:0006518)	516	36	6.44	+	5.59	1.2e-12
defense response to other organism (GO:0098542)	764	14	2.98	+	4.7	0.00547	organonitrogen compound metabolic process (GO:1901564)	3927	394	287.91	+	1.37	1.38e-06	primary metabolic process (GO:0044238)	6105	123	76.16	+	1.62	2.86e-05
endoplasmic reticulum unfolded protein response (GO:0030968)	36	5	0.14	+	35.59	0.00149	pattern recognition receptor signaling pathway (GO:0002221)	14	9	1.03	+	8.77	0.0297	ribonucleoprotein complex assembly (GO:0022618)	154	15	1.92	+	7.81	8.87e-06
response to bacterium (GO:0009617)	477	11	1.86	+	5.91	0.00899	phosphate-containing compound metabolic process (GO:0006796)	1575	218	115.47	+	1.89	8.01e-14	ribonucleoprotein complex biogenesis (GO:0022613)	422	50	5.26	+	9.5	3.05e-28
response to chitin (GO:0010200)	137	10	0.53	+	18.7	8.63e-07	phosphorus metabolic process (GO:0006793)	1615	230	118.4	+	1.94	4.82e-16	ribonucleoprotein complex subunit organization (GO:0071826)	157	15	1.96	+	7.66	1.13e-05
response to heat (GO:0009408)	205	8	0.8	+	10	0.00526	phosphorylation (GO:0016310)	1111	177	81.45	+	2.17	7.85e-16	ribosomal large subunit assembly (GO:0000027)	43	9	0.54	+	16.78	3.75e-05
response to ozone (GO:0010193)	33	4	0.13	+	31.06	0.0356	positive regulation of defense response (GO:0031349)	107	30	7.84	+	3.82	2.82e-05	ribosomal large subunit biogenesis (GO:0042273)	107	22	1.33	+	16.48	1.51e-15
							positive regulation of immune response (GO:0050778)	77	26	5.65	+	4.61	1.14e-05	ribosomal small subunit biogenesis (GO:0042274)	86	15	1.07	+	13.98	5.31e-09
							positive regulation of immune system process (GO:0002684)	77	26	5.65	+	4.61	1.14e-05	ribosome assembly (GO:0042255)	85	16	1.06	+	15.09	3.4e-10
							positive regulation of innate immune response (GO:0045089)	77	26	5.65	+	4.61	1.14e-05	ribosome biogenesis (GO:0042254)	351	49	4.38	+	11.19	1.32e-30
							positive regulation of multi-organism process (GO:0043902)	100	29	7.33	+	3.96	2.64e-05	RNA metabolic process (GO:0016070)	1227	42	15.31	+	2.74	1.81e-05
							positive regulation of response to biotic stimulus (GO:0002833)	99	29	7.26	+	4	2.19e-05	RNA processing (GO:0006396)	756	35	9.43	+	3.71	2.2e-07
							positive regulation of response to external stimulus (GO:0032103)	102	29	7.48	+	3.88	3.81e-05	rRNA metabolic process (GO:0016072)	242	31	3.02	+	10.27	2.16e-17
							positive regulation of response to stimulus (GO:0048584)	243	46	17.82	+	2.58	0.000272	rRNA processing (GO:0006364)	236	31	2.94	+	10.53	1.11e-17
							protein autophosphorylation (GO:0046777)	183	40	13.42	+	2.98	4.98e-05	translation (GO:0006412)	431	34	5.38	+	6.32	2.74e-13
							protein metabolic process (GO:0019538)	2940	289	215.55	+	1.34	0.0028	translational elongation (GO:0006414)	36	6	0.45	+	13.36	0.0333
							protein modification process (GO:0036211)	1891	222	138.64	+	1.6	1.86e-07	Unclassified (UNCLASSIFIED)	6685	70	83.39	-	0.84	0
							protein phosphorylation (GO:0006468)	799	137	58.58	+	2.34	5.7e-14	CHILD GO TERMS REPRESENTING HIERARCHICAL CATEGORIES
							regulation of biological process (GO:0050789)	4941	458	362.25	+	1.26	0.000548	maturation of LSU-rRNA from tricistronic rRNA transcript (SSU-rRNA, 5.8S rRNA, LSU-rRNA) (GO:0000463)	18	6	0.22	+	26.72	0.00103
							regulation of cellular process (GO:0050794)	4297	403	315.03	+	1.28	0.0014	maturation of SSU-rRNA from tricistronic rRNA transcript (SSU-rRNA, 5.8S rRNA, LSU-rRNA) (GO:0000462)	35	7	0.44	+	16.03	0.00208
							regulation of defense response (GO:0031347)	259	66	18.99	+	3.48	2.78e-12	ribosomal large subunit assembly (GO:0000027)	43	9	0.54	+	16.78	3.75e-05
							regulation of immune response (GO:0050776)	130	42	9.53	+	4.41	7.37e-10	translational elongation (GO:0006414)	36	6	0.45	+	13.36	0.0333
							regulation of immune system process (GO:0002682)	141	45	10.34	+	4.35	1.5e-10
							regulation of innate immune response (GO:0045088)	126	42	9.24	+	4.55	3.11e-10
							regulation of jasmonic acid mediated signaling pathway (GO:2000022)	40	14	2.93	+	4.77	0.0306
							regulation of multi-organism process (GO:0043900)	280	58	20.53	+	2.83	3.11e-07
							regulation of response to biotic stimulus (GO:0002831)	184	54	13.49	+	4	8.78e-12
							regulation of response to external stimulus (GO:0032101)	189	55	13.86	+	3.97	6.58e-12
							regulation of response to stimulus (GO:0048583)	691	114	50.66	+	2.25	2.83e-10
							regulation of response to stress (GO:0080134)	374	82	27.42	+	2.99	1.7e-12
							response to abiotic stimulus (GO:0009628)	2062	278	151.18	+	1.84	4.61e-17
							response to abscisic acid (GO:0009737)	524	70	38.42	+	1.82	0.0216
							response to acid chemical (GO:0001101)	1126	168	82.55	+	2.04	1.34e-12
							response to alcohol (GO:0097305)	528	70	38.71	+	1.81	0.0323
							response to antibiotic (GO:0046677)	286	56	20.97	+	2.67	2.81e-06
							response to bacterium (GO:0009617)	477	113	34.97	+	3.23	2.4e-20
							response to biotic stimulus (GO:0009607)	1022	220	74.93	+	2.94	8.4e-37
							response to chemical (GO:0042221)	2661	408	195.09	+	2.09	1.19e-38
							response to chitin (GO:0010200)	137	56	10.04	+	5.58	1.31e-17
							response to decreased oxygen levels (GO:0036293)	263	90	19.28	+	4.67	5.97e-25
							response to drug (GO:0042493)	501	116	36.73	+	3.16	3.03e-20
							response to endogenous stimulus (GO:0009719)	1378	175	101.03	+	1.73	1.05e-07
							response to ethylene (GO:0009723)	206	38	15.1	+	2.52	0.00609
							response to external biotic stimulus (GO:0043207)	1021	220	74.85	+	2.94	7.38e-37
							response to external stimulus (GO:0009605)	1424	255	104.4	+	2.44	2.74e-31
							response to fungus (GO:0009620)	321	74	23.53	+	3.14	4.85e-12
							response to hormone (GO:0009725)	1360	173	99.71	+	1.74	1.56e-07
							response to hypoxia (GO:0001666)	259	89	18.99	+	4.69	9.37e-25
							response to inorganic substance (GO:0010035)	892	127	65.4	+	1.94	1.22e-07
							response to jasmonic acid (GO:0009753)	217	42	15.91	+	2.64	0.000456
							response to molecule of bacterial origin (GO:0002237)	34	13	2.49	+	5.22	0.0292
							response to nitrogen compound (GO:1901698)	291	73	21.33	+	3.42	1.71e-13
							response to oomycetes (GO:0002239)	87	23	6.38	+	3.61	0.00338
							response to organic substance (GO:0010033)	1712	252	125.52	+	2.01	1.05e-19
							response to organonitrogen compound (GO:0010243)	242	68	17.74	+	3.83	1.54e-14
							response to osmotic stress (GO:0006970)	545	76	39.96	+	1.9	0.00205
							response to other organism (GO:0051707)	1021	220	74.85	+	2.94	7.38e-37
							response to oxidative stress (GO:0006979)	392	59	28.74	+	2.05	0.00493
							response to oxygen levels (GO:0070482)	264	90	19.36	+	4.65	7.49e-25
							response to oxygen-containing compound (GO:1901700)	1504	233	110.27	+	2.11	1.95e-20
							response to salicylic acid (GO:0009751)	206	37	15.1	+	2.45	0.0123
							response to salt stress (GO:0009651)	469	66	34.38	+	1.92	0.00966
							response to stimulus (GO:0050896)	5327	718	390.55	+	1.84	8.71e-57
							response to stress (GO:0006950)	3079	471	225.74	+	2.09	8.05e-46
							response to wounding (GO:0009611)	207	59	15.18	+	3.89	1.4e-12
							secondary metabolic process (GO:0019748)	317	48	23.24	+	2.07	0.0381
							signal transduction (GO:0007165)	1300	189	95.31	+	1.98	2.12e-13
							signaling (GO:0023052)	1334	189	97.8	+	1.93	1.82e-12
							Unclassified (UNCLASSIFIED)	6685	418	490.11	-	0.85	0
							CHILD GO TERMS REPRESENTING HIERARCHICAL CATEGORIES
							cellular response to ethylene stimulus (GO:0071369)	103	24	7.55	+	3.18	0.0132
							cellular response to hypoxia (GO:0071456)	234	87	17.16	+	5.07	3.97e-26
							defense response to fungus (GO:0050832)	244	52	17.89	+	2.91	8.43e-07
							defense response, incompatible interaction (GO:0009814)	174	38	12.76	+	2.98	0.000114
							indole-containing compound biosynthetic process (GO:0042435)	49	16	3.59	+	4.45	0.0153
							induced systemic resistance (GO:0009682)	30	13	2.2	+	5.91	0.00981
							intracellular signal transduction (GO:0035556)	465	71	34.09	+	2.08	0.000241
							pattern recognition receptor signaling pathway (GO:0002221)	14	9	1.03	+	8.77	0.0297
							protein autophosphorylation (GO:0046777)	183	40	13.42	+	2.98	4.98e-05
							regulation of jasmonic acid mediated signaling pathway (GO:2000022)	40	14	2.93	+	4.77	0.0306
							response to abscisic acid (GO:0009737)	524	70	38.42	+	1.82	0.0216
							response to chitin (GO:0010200)	137	56	10.04	+	5.58	1.31e-17
							response to inorganic substance (GO:0010035)	892	127	65.4	+	1.94	1.22e-07
							response to jasmonic acid (GO:0009753)	217	42	15.91	+	2.64	0.000456
							response to molecule of bacterial origin (GO:0002237)	34	13	2.49	+	5.22	0.0292
							response to oxidative stress (GO:0006979)	392	59	28.74	+	2.05	0.00493
							response to salicylic acid (GO:0009751)	206	37	15.1	+	2.45	0.0123
							response to salt stress (GO:0009651)	469	66	34.38	+	1.92	0.00966
							response to wounding (GO:0009611)	207	59	15.18	+	3.89	1.4e-12
							secondary metabolic process (GO:0019748)	317	48	23.24	+	2.07	0.0381

## Sheet: O157H7_Up_24 HPI
Dataset S10. Overrepresented gene ontology terms from up and downregulated genes that overlap between Arabidopsis and lettuce plants inoculated with 1 x 109 CFU/mL of Escherichia coli O157:H7 or Salmonella enterica Typhimurium 14028s at 4 and 24 hours post inoculation (HPI).
Shared							Arabidopsis Specific							Lettuce Specific
ALL GO TERMS							ALL GO TERMS							ALL GO TERMS
Analysis Type:	PANTHER Overrepresentation Test (Released 20190711)						Analysis Type:	PANTHER Overrepresentation Test (Released 20190711)						Analysis Type:	PANTHER Overrepresentation Test (Released 20190711)
Annotation Version and Release Date:	GO Ontology database Released 2019-12-09						Annotation Version and Release Date:	GO Ontology database Released 2019-12-09						Annotation Version and Release Date:	GO Ontology database Released 2019-12-09
Analyzed List:	upload_1 (Arabidopsis thaliana)						Analyzed List:	upload_1 (Arabidopsis thaliana)						Analyzed List:	upload_1 (Arabidopsis thaliana)
Reference List:	Arabidopsis thaliana (all genes in database)						Reference List:	Arabidopsis thaliana (all genes in database)						Reference List:	Arabidopsis thaliana (all genes in database)
Test Type:	FISHER						Test Type:	FISHER						Test Type:	FISHER
Correction:	BONFERRONI						Correction:	BONFERRONI						Correction:	BONFERRONI
Bonferroni count:	2757						Bonferroni count:	2757						Bonferroni count:	2757
GO biological process complete	Arabidopsis thaliana - REFLIST (27416)	upload_1 (447)	upload_1 (expected)	upload_1 (over/under)	upload_1 (fold Enrichment)	upload_1 (P-value)	GO biological process complete	Arabidopsis thaliana - REFLIST (27416)	upload_1 (2005)	upload_1 (expected)	upload_1 (over/under)	upload_1 (fold Enrichment)	upload_1 (P-value)	GO biological process complete	Arabidopsis thaliana - REFLIST (27416)	upload_1 (752)	upload_1 (expected)	upload_1 (over/under)	upload_1 (fold Enrichment)	upload_1 (P-value)
biological regulation (GO:0065007)	5644	132	92.02	+	1.43	0.0258	activation of immune response (GO:0002253)	62	18	4.53	+	3.97	0.0155	carbohydrate derivative metabolic process (GO:1901135)	621	38	17.03	+	2.23	0.0323
cell communication (GO:0007154)	1560	62	25.43	+	2.44	7.13e-07	activation of innate immune response (GO:0002218)	61	18	4.46	+	4.03	0.0128	cell communication (GO:0007154)	1560	76	42.79	+	1.78	0.00711
cell death (GO:0008219)	112	12	1.83	+	6.57	0.00218	amide biosynthetic process (GO:0043604)	502	8	36.71	-	0.22	0.000109	cellular lipid metabolic process (GO:0044255)	624	45	17.12	+	2.63	7.86e-05
cellular component organization or biogenesis (GO:0071840)	2822	18	46.01	-	0.39	0.00505	biological regulation (GO:0065007)	5644	512	412.76	+	1.24	0.000708	cellular process (GO:0009987)	10043	344	275.47	+	1.25	0.00134
cellular nitrogen compound metabolic process (GO:0034641)	2671	16	43.55	-	0.37	0.00401	cell communication (GO:0007154)	1560	214	114.09	+	1.88	2.88e-13	cellular response to chemical stimulus (GO:0070887)	1128	75	30.94	+	2.42	3.24e-08
cellular protein modification process (GO:0006464)	1891	66	30.83	+	2.14	2.92e-05	cellular nitrogen compound metabolic process (GO:0034641)	2671	123	195.34	-	0.63	6.61e-05	cellular response to decreased oxygen levels (GO:0036294)	236	22	6.47	+	3.4	0.00535
cellular response to acid chemical (GO:0071229)	354	20	5.77	+	3.47	0.00889	cellular process (GO:0009987)	10043	861	734.47	+	1.17	6.37e-05	cellular response to endogenous stimulus (GO:0071495)	643	41	17.64	+	2.32	0.00463
cellular response to chemical stimulus (GO:0070887)	1128	65	18.39	+	3.53	1.54e-14	cellular protein metabolic process (GO:0044267)	2699	269	197.38	+	1.36	0.00229	cellular response to hypoxia (GO:0071456)	234	22	6.42	+	3.43	0.00471
cellular response to decreased oxygen levels (GO:0036294)	236	28	3.85	+	7.28	9.82e-12	cellular protein modification process (GO:0006464)	1891	227	138.29	+	1.64	1.14e-08	cellular response to organic substance (GO:0071310)	755	45	20.71	+	2.17	0.00891
cellular response to endogenous stimulus (GO:0071495)	643	28	10.48	+	2.67	0.0135	cellular response to chemical stimulus (GO:0070887)	1128	163	82.49	+	1.98	4.79e-11	cellular response to oxygen levels (GO:0071453)	236	22	6.47	+	3.4	0.00535
cellular response to hormone stimulus (GO:0032870)	624	28	10.17	+	2.75	0.00786	cellular response to decreased oxygen levels (GO:0036294)	236	68	17.26	+	3.94	4.56e-15	cellular response to oxygen-containing compound (GO:1901701)	500	36	13.71	+	2.62	0.00135
cellular response to hypoxia (GO:0071456)	234	28	3.82	+	7.34	8.07e-12	cellular response to hypoxia (GO:0071456)	234	67	17.11	+	3.92	1.07e-14	cellular response to stimulus (GO:0051716)	2416	124	66.27	+	1.87	1.12e-07
cellular response to organic substance (GO:0071310)	755	33	12.31	+	2.68	0.00176	cellular response to oxygen levels (GO:0071453)	236	68	17.26	+	3.94	4.56e-15	defense response (GO:0006952)	1005	70	27.57	+	2.54	3.07e-08
cellular response to oxygen levels (GO:0071453)	236	28	3.85	+	7.28	9.82e-12	cellular response to stimulus (GO:0051716)	2416	329	176.69	+	1.86	8.27e-22	defense response to bacterium (GO:0042742)	394	29	10.81	+	2.68	0.0116
cellular response to stimulus (GO:0051716)	2416	104	39.39	+	2.64	3.32e-16	cellular response to stress (GO:0033554)	1139	165	83.3	+	1.98	2.59e-11	defense response to other organism (GO:0098542)	764	51	20.96	+	2.43	6.95e-05
cellular response to stress (GO:0033554)	1139	57	18.57	+	3.07	6.21e-10	defense response (GO:0006952)	1005	186	73.5	+	2.53	1.5e-23	gene expression (GO:0010467)	1403	10	38.48	-	0.26	0.000183
defense response (GO:0006952)	1005	68	16.39	+	4.15	6.96e-19	defense response to bacterium (GO:0042742)	394	88	28.81	+	3.05	4.75e-14	immune response (GO:0006955)	304	25	8.34	+	3	0.00891
defense response to bacterium (GO:0042742)	394	31	6.42	+	4.83	8.36e-09	defense response to fungus (GO:0050832)	244	51	17.84	+	2.86	2.05e-06	immune system process (GO:0002376)	372	30	10.2	+	2.94	0.00139
defense response to fungus (GO:0050832)	244	19	3.98	+	4.78	0.000167	defense response to oomycetes (GO:0002229)	67	22	4.9	+	4.49	0.000252	innate immune response (GO:0045087)	300	25	8.23	+	3.04	0.00717
defense response to other organism (GO:0098542)	764	55	12.46	+	4.42	7.76e-16	defense response to other organism (GO:0098542)	764	157	55.87	+	2.81	1.88e-23	isopentenyl diphosphate biosynthetic process (GO:0009240)	14	6	0.38	+	15.62	0.0275
defense response, incompatible interaction (GO:0009814)	174	15	2.84	+	5.29	0.00125	defense response, incompatible interaction (GO:0009814)	174	33	12.73	+	2.59	0.0134	isopentenyl diphosphate metabolic process (GO:0046490)	14	6	0.38	+	15.62	0.0275
gene expression (GO:0010467)	1403	2	22.88	-	0.09	0.00012	gene expression (GO:0010467)	1403	37	102.6	-	0.36	7.1e-10	lipid metabolic process (GO:0006629)	728	49	19.97	+	2.45	0.00012
heterocycle metabolic process (GO:0046483)	2256	12	36.78	-	0.33	0.00538	heterocycle metabolic process (GO:0046483)	2256	103	164.99	-	0.62	0.000648	monocarboxylic acid metabolic process (GO:0032787)	423	32	11.6	+	2.76	0.00216
host programmed cell death induced by symbiont (GO:0034050)	58	11	0.95	+	11.63	3.49e-05	immune response (GO:0006955)	304	62	22.23	+	2.79	8.97e-08	multi-organism process (GO:0051704)	1495	84	41.01	+	2.05	4.47e-06
immune response (GO:0006955)	304	29	4.96	+	5.85	5.25e-10	immune system process (GO:0002376)	372	76	27.21	+	2.79	4.5e-10	nucleic acid metabolic process (GO:0090304)	1629	14	44.68	-	0.31	0.000373
immune system process (GO:0002376)	372	35	6.07	+	5.77	2.27e-12	indole-containing compound metabolic process (GO:0042430)	71	19	5.19	+	3.66	0.0232	organic acid metabolic process (GO:0006082)	956	53	26.22	+	2.02	0.00928
innate immune response (GO:0045087)	300	28	4.89	+	5.72	2.25e-09	innate immune response (GO:0045087)	300	62	21.94	+	2.83	6.57e-08	oxidation-reduction process (GO:0055114)	971	55	26.63	+	2.07	0.00396
leaf senescence (GO:0010150)	103	10	1.68	+	5.95	0.0401	macromolecule modification (GO:0043412)	2295	232	167.84	+	1.38	0.00654	oxoacid metabolic process (GO:0043436)	949	53	26.03	+	2.04	0.00834
macromolecule modification (GO:0043412)	2295	66	37.42	+	1.76	0.028	mRNA metabolic process (GO:0016071)	434	8	31.74	-	0.25	0.00415	phenylpropanoid biosynthetic process (GO:0009699)	85	12	2.33	+	5.15	0.0297
multi-organism cellular process (GO:0044764)	84	11	1.37	+	8.03	0.00103	multi-organism process (GO:0051704)	1495	230	109.33	+	2.1	5.93e-20	phosphate-containing compound metabolic process (GO:0006796)	1575	80	43.2	+	1.85	0.000986
multi-organism process (GO:0051704)	1495	81	24.38	+	3.32	2.34e-17	ncRNA metabolic process (GO:0034660)	407	8	29.76	-	0.27	0.0211	phosphorus metabolic process (GO:0006793)	1615	84	44.3	+	1.9	0.000158
nucleic acid metabolic process (GO:0090304)	1629	2	26.56	-	0.08	3.73e-06	nucleic acid metabolic process (GO:0090304)	1629	47	119.13	-	0.39	2.6e-10	phosphorylation (GO:0016310)	1111	59	30.47	+	1.94	0.0115
nucleobase-containing compound metabolic process (GO:0006139)	1966	6	32.05	-	0.19	6.27e-05	nucleobase-containing compound metabolic process (GO:0006139)	1966	72	143.78	-	0.5	1.54e-07	positive regulation of cell communication (GO:0010647)	86	13	2.36	+	5.51	0.00652
organelle organization (GO:0006996)	1608	3	26.22	-	0.11	4.5e-05	organonitrogen compound metabolic process (GO:1901564)	3927	372	287.19	+	1.3	0.00143	positive regulation of response to stimulus (GO:0048584)	243	23	6.67	+	3.45	0.00247
phosphate-containing compound metabolic process (GO:0006796)	1575	55	25.68	+	2.14	0.000582	peptide biosynthetic process (GO:0043043)	436	6	31.89	-	0.19	0.00027	positive regulation of signal transduction (GO:0009967)	83	13	2.28	+	5.71	0.00458
phosphorus metabolic process (GO:0006793)	1615	56	26.33	+	2.13	0.000501	phosphate-containing compound metabolic process (GO:0006796)	1575	207	115.18	+	1.8	6.11e-11	positive regulation of signaling (GO:0023056)	83	13	2.28	+	5.71	0.00458
phosphorylation (GO:0016310)	1111	49	18.11	+	2.71	2.17e-06	phosphorus metabolic process (GO:0006793)	1615	214	118.11	+	1.81	8.69e-12	regulation of biological quality (GO:0065008)	1152	59	31.6	+	1.87	0.0267
plant-type hypersensitive response (GO:0009626)	57	11	0.93	+	11.84	2.98e-05	phosphorylation (GO:0016310)	1111	171	81.25	+	2.1	4.29e-14	response to abiotic stimulus (GO:0009628)	2062	93	56.56	+	1.64	0.0145
programmed cell death (GO:0012501)	91	11	1.48	+	7.41	0.00212	positive regulation of defense response (GO:0031349)	107	29	7.83	+	3.71	8.79e-05	response to acid chemical (GO:0001101)	1126	67	30.89	+	2.17	3.12e-05
protein autophosphorylation (GO:0046777)	183	18	2.98	+	6.03	1.35e-05	positive regulation of immune response (GO:0050778)	77	24	5.63	+	4.26	0.000151	response to bacterium (GO:0009617)	477	34	13.08	+	2.6	0.00346
protein modification process (GO:0036211)	1891	66	30.83	+	2.14	2.92e-05	positive regulation of immune system process (GO:0002684)	77	24	5.63	+	4.26	0.000151	response to biotic stimulus (GO:0009607)	1022	65	28.03	+	2.32	5.16e-06
protein phosphorylation (GO:0006468)	799	43	13.03	+	3.3	7.87e-08	positive regulation of innate immune response (GO:0045089)	77	24	5.63	+	4.26	0.000151	response to chemical (GO:0042221)	2661	157	72.99	+	2.15	6.4e-16
regulation of defense response (GO:0031347)	259	19	4.22	+	4.5	0.000399	positive regulation of multi-organism process (GO:0043902)	100	28	7.31	+	3.83	8.43e-05	response to chitin (GO:0010200)	137	16	3.76	+	4.26	0.01
regulation of hormone metabolic process (GO:0032350)	61	8	0.99	+	8.04	0.0404	positive regulation of response to biotic stimulus (GO:0002833)	99	27	7.24	+	3.73	0.000233	response to decreased oxygen levels (GO:0036293)	263	24	7.21	+	3.33	0.00263
regulation of jasmonic acid mediated signaling pathway (GO:2000022)	40	9	0.65	+	13.8	0.000208	positive regulation of response to external stimulus (GO:0032103)	102	27	7.46	+	3.62	0.000388	response to drug (GO:0042493)	501	34	13.74	+	2.47	0.0107
regulation of response to stimulus (GO:0048583)	691	32	11.27	+	2.84	0.000786	positive regulation of response to stimulus (GO:0048584)	243	42	17.77	+	2.36	0.00659	response to endogenous stimulus (GO:0009719)	1378	84	37.8	+	2.22	1.47e-07
regulation of response to stress (GO:0080134)	374	20	6.1	+	3.28	0.0193	protein metabolic process (GO:0019538)	2940	287	215.01	+	1.33	0.00471	response to external biotic stimulus (GO:0043207)	1021	65	28.01	+	2.32	5.06e-06
regulation of salicylic acid biosynthetic process (GO:0080142)	12	5	0.2	+	25.56	0.0151	protein modification process (GO:0036211)	1891	227	138.29	+	1.64	1.14e-08	response to external stimulus (GO:0009605)	1424	77	39.06	+	1.97	0.000157
regulation of salicylic acid metabolic process (GO:0010337)	20	8	0.33	+	24.53	2.67e-05	protein phosphorylation (GO:0006468)	799	138	58.43	+	2.36	1.75e-14	response to hormone (GO:0009725)	1360	80	37.3	+	2.14	1.94e-06
response to abiotic stimulus (GO:0009628)	2062	85	33.62	+	2.53	1.75e-11	regulation of defense response (GO:0031347)	259	55	18.94	+	2.9	2.69e-07	response to hypoxia (GO:0001666)	259	24	7.1	+	3.38	0.00204
response to abscisic acid (GO:0009737)	524	27	8.54	+	3.16	0.000972	regulation of immune response (GO:0050776)	130	36	9.51	+	3.79	1.23e-06	response to inorganic substance (GO:0010035)	892	52	24.47	+	2.13	0.00257
response to acid chemical (GO:0001101)	1126	58	18.36	+	3.16	1.17e-10	regulation of immune system process (GO:0002682)	141	38	10.31	+	3.69	7.87e-07	response to lipid (GO:0033993)	704	45	19.31	+	2.33	0.00203
response to alcohol (GO:0097305)	528	27	8.61	+	3.14	0.00112	regulation of innate immune response (GO:0045088)	126	36	9.21	+	3.91	6e-07	response to metal ion (GO:0010038)	456	33	12.51	+	2.64	0.00363
response to antibiotic (GO:0046677)	286	18	4.66	+	3.86	0.00671	regulation of multi-organism process (GO:0043900)	280	50	20.48	+	2.44	0.000313	response to nitrogen compound (GO:1901698)	291	24	7.98	+	3.01	0.0133
response to bacterium (GO:0009617)	477	36	7.78	+	4.63	4.4e-10	regulation of response to biotic stimulus (GO:0002831)	184	47	13.46	+	3.49	3.12e-08	response to organic cyclic compound (GO:0014070)	336	27	9.22	+	2.93	0.00547
response to biotic stimulus (GO:0009607)	1022	72	16.66	+	4.32	3.71e-21	regulation of response to external stimulus (GO:0032101)	189	47	13.82	+	3.4	6.83e-08	response to organic substance (GO:0010033)	1712	99	46.96	+	2.11	3.83e-08
response to chemical (GO:0042221)	2661	125	43.39	+	2.88	8.82e-24	regulation of response to stimulus (GO:0048583)	691	89	50.53	+	1.76	0.00469	response to other organism (GO:0051707)	1021	65	28.01	+	2.32	5.06e-06
response to chitin (GO:0010200)	137	27	2.23	+	12.09	3.53e-16	regulation of response to stress (GO:0080134)	374	68	27.35	+	2.49	1.07e-06	response to oxygen levels (GO:0070482)	264	24	7.24	+	3.31	0.00279
response to decreased oxygen levels (GO:0036293)	263	32	4.29	+	7.46	5.15e-14	response to abiotic stimulus (GO:0009628)	2062	214	150.8	+	1.42	0.00317	response to oxygen-containing compound (GO:1901700)	1504	89	41.25	+	2.16	1.11e-07
response to drug (GO:0042493)	501	48	8.17	+	5.88	3.62e-18	response to acid chemical (GO:0001101)	1126	133	82.35	+	1.62	0.00117	response to stimulus (GO:0050896)	5327	267	146.12	+	1.83	1.18e-20
response to endogenous stimulus (GO:0009719)	1378	55	22.47	+	2.45	9.09e-06	response to antibiotic (GO:0046677)	286	51	20.92	+	2.44	0.000234	response to stress (GO:0006950)	3079	150	84.45	+	1.78	2.77e-08
response to external biotic stimulus (GO:0043207)	1021	72	16.65	+	4.33	3.51e-21	response to bacterium (GO:0009617)	477	110	34.88	+	3.15	4.87e-19	response to wounding (GO:0009611)	207	19	5.68	+	3.35	0.0323
response to external stimulus (GO:0009605)	1424	83	23.22	+	3.57	8.54e-20	response to biotic stimulus (GO:0009607)	1022	207	74.74	+	2.77	3.1e-31	secondary metabolic process (GO:0019748)	317	26	8.7	+	2.99	0.00596
response to fungus (GO:0009620)	321	27	5.23	+	5.16	5.36e-08	response to chemical (GO:0042221)	2661	348	194.61	+	1.79	1.46e-20	secondary metabolite biosynthetic process (GO:0044550)	147	19	4.03	+	4.71	0.000304
response to hormone (GO:0009725)	1360	55	22.17	+	2.48	3.9e-06	response to chitin (GO:0010200)	137	36	10.02	+	3.59	4.08e-06	signal transduction (GO:0007165)	1300	67	35.66	+	1.88	0.00481
response to hypoxia (GO:0001666)	259	32	4.22	+	7.58	3.44e-14	response to decreased oxygen levels (GO:0036293)	263	69	19.23	+	3.59	1.56e-13	signaling (GO:0023052)	1334	67	36.59	+	1.83	0.0142
response to inorganic substance (GO:0010035)	892	35	14.54	+	2.41	0.00907	response to drug (GO:0042493)	501	94	36.64	+	2.57	6.54e-11	small molecule catabolic process (GO:0044282)	208	20	5.71	+	3.51	0.0101
response to lipid (GO:0033993)	704	32	11.48	+	2.79	0.00116	response to endogenous stimulus (GO:0009719)	1378	152	100.78	+	1.51	0.00691	small molecule metabolic process (GO:0044281)	1400	81	38.4	+	2.11	3.37e-06
response to nitrogen compound (GO:1901698)	291	34	4.74	+	7.17	1.53e-14	response to endoplasmic reticulum stress (GO:0034976)	97	28	7.09	+	3.95	4.88e-05	Unclassified (UNCLASSIFIED)	6685	171	183.36	-	0.93	0
response to organic substance (GO:0010033)	1712	85	27.91	+	3.05	4.15e-16	response to external biotic stimulus (GO:0043207)	1021	207	74.67	+	2.77	2.83e-31	CHILD GO TERMS REPRESENTING HIERARCHICAL CATEGORIES
response to organonitrogen compound (GO:0010243)	242	33	3.95	+	8.36	7.16e-16	response to external stimulus (GO:0009605)	1424	242	104.14	+	2.32	9.53e-27	carbohydrate derivative metabolic process (GO:1901135)	621	38	17.03	+	2.23	0.0323
response to other organism (GO:0051707)	1021	72	16.65	+	4.33	3.51e-21	response to fungus (GO:0009620)	321	68	23.48	+	2.9	1.86e-09	cellular response to endogenous stimulus (GO:0071495)	643	41	17.64	+	2.32	0.00463
response to oxidative stress (GO:0006979)	392	21	6.39	+	3.29	0.0111	response to hormone (GO:0009725)	1360	150	99.46	+	1.51	0.00781	cellular response to hypoxia (GO:0071456)	234	22	6.42	+	3.43	0.00471
response to oxygen levels (GO:0070482)	264	32	4.3	+	7.43	5.69e-14	response to hypoxia (GO:0001666)	259	68	18.94	+	3.59	2.55e-13	cellular response to organic substance (GO:0071310)	755	45	20.71	+	2.17	0.00891
response to oxygen-containing compound (GO:1901700)	1504	81	24.52	+	3.3	3.32e-17	response to nitrogen compound (GO:1901698)	291	58	21.28	+	2.73	7.52e-07	cellular response to oxygen-containing compound (GO:1901701)	500	36	13.71	+	2.62	0.00135
response to salicylic acid (GO:0009751)	206	14	3.36	+	4.17	0.0393	response to oomycetes (GO:0002239)	87	31	6.36	+	4.87	1.2e-07	defense response to bacterium (GO:0042742)	394	29	10.81	+	2.68	0.0116
response to stimulus (GO:0050896)	5327	207	86.85	+	2.38	2.1e-33	response to organic substance (GO:0010033)	1712	216	125.2	+	1.73	5.56e-10	innate immune response (GO:0045087)	300	25	8.23	+	3.04	0.00717
response to stress (GO:0006950)	3079	137	50.2	+	2.73	1.96e-24	response to organonitrogen compound (GO:0010243)	242	52	17.7	+	2.94	6.03e-07	isopentenyl diphosphate biosynthetic process (GO:0009240)	14	6	0.38	+	15.62	0.0275
response to wounding (GO:0009611)	207	20	3.38	+	5.93	2.51e-06	response to other organism (GO:0051707)	1021	207	74.67	+	2.77	2.83e-31	monocarboxylic acid metabolic process (GO:0032787)	423	32	11.6	+	2.76	0.00216
RNA metabolic process (GO:0016070)	1227	2	20.01	-	0.1	0.00171	response to oxidative stress (GO:0006979)	392	57	28.67	+	1.99	0.0189	oxidation-reduction process (GO:0055114)	971	55	26.63	+	2.07	0.00396
signal transduction (GO:0007165)	1300	54	21.2	+	2.55	2.65e-06	response to oxygen levels (GO:0070482)	264	69	19.31	+	3.57	1.85e-13	phenylpropanoid biosynthetic process (GO:0009699)	85	12	2.33	+	5.15	0.0297
signaling (GO:0023052)	1334	54	21.75	+	2.48	5.45e-06	response to oxygen-containing compound (GO:1901700)	1504	190	109.99	+	1.73	1.93e-08	phosphorylation (GO:0016310)	1111	59	30.47	+	1.94	0.0115
Unclassified (UNCLASSIFIED)	6685	78	108.99	-	0.72	0	response to stimulus (GO:0050896)	5327	650	389.58	+	1.67	2.14e-36	positive regulation of signal transduction (GO:0009967)	83	13	2.28	+	5.71	0.00458
CHILD GO TERMS REPRESENTING HIERARCHICAL CATEGORIES							response to stress (GO:0006950)	3079	413	225.17	+	1.83	1.44e-27	response to acid chemical (GO:0001101)	1126	67	30.89	+	2.17	3.12e-05
cellular response to acid chemical (GO:0071229)	354	20	5.77	+	3.47	0.00889	response to toxic substance (GO:0009636)	187	34	13.68	+	2.49	0.0271	response to chitin (GO:0010200)	137	16	3.76	+	4.26	0.01
cellular response to hormone stimulus (GO:0032870)	624	28	10.17	+	2.75	0.00786	RNA metabolic process (GO:0016070)	1227	25	89.73	-	0.28	7.26e-12	response to hormone (GO:0009725)	1360	80	37.3	+	2.14	1.94e-06
cellular response to hypoxia (GO:0071456)	234	28	3.82	+	7.34	8.07e-12	RNA modification (GO:0009451)	357	4	26.11	-	0.15	0.000795	response to lipid (GO:0033993)	704	45	19.31	+	2.33	0.00203
defense response to bacterium (GO:0042742)	394	31	6.42	+	4.83	8.36e-09	RNA processing (GO:0006396)	756	14	55.29	-	0.25	4.26e-07	response to metal ion (GO:0010038)	456	33	12.51	+	2.64	0.00363
defense response to fungus (GO:0050832)	244	19	3.98	+	4.78	0.000167	signal transduction (GO:0007165)	1300	184	95.07	+	1.94	4.25e-12	response to organic cyclic compound (GO:0014070)	336	27	9.22	+	2.93	0.00547
defense response, incompatible interaction (GO:0009814)	174	15	2.84	+	5.29	0.00125	signaling (GO:0023052)	1334	184	97.56	+	1.89	3.32e-11	response to wounding (GO:0009611)	207	19	5.68	+	3.35	0.0323
leaf senescence (GO:0010150)	103	10	1.68	+	5.95	0.0401	translation (GO:0006412)	431	5	31.52	-	0.16	6.88e-05	signal transduction (GO:0007165)	1300	67	35.66	+	1.88	0.00481
plant-type hypersensitive response (GO:0009626)	57	11	0.93	+	11.84	2.98e-05	Unclassified (UNCLASSIFIED)	6685	463	488.89	-	0.95	0	small molecule catabolic process (GO:0044282)	208	20	5.71	+	3.51	0.0101
protein autophosphorylation (GO:0046777)	183	18	2.98	+	6.03	1.35e-05	CHILD GO TERMS REPRESENTING HIERARCHICAL CATEGORIES
regulation of defense response (GO:0031347)	259	19	4.22	+	4.5	0.000399	activation of innate immune response (GO:0002218)	61	18	4.46	+	4.03	0.0128
regulation of jasmonic acid mediated signaling pathway (GO:2000022)	40	9	0.65	+	13.8	0.000208	cellular response to hypoxia (GO:0071456)	234	67	17.11	+	3.92	1.07e-14
regulation of salicylic acid biosynthetic process (GO:0080142)	12	5	0.2	+	25.56	0.0151	defense response to bacterium (GO:0042742)	394	88	28.81	+	3.05	4.75e-14
response to abscisic acid (GO:0009737)	524	27	8.54	+	3.16	0.000972	defense response to fungus (GO:0050832)	244	51	17.84	+	2.86	2.05e-06
response to chitin (GO:0010200)	137	27	2.23	+	12.09	3.53e-16	defense response to oomycetes (GO:0002229)	67	22	4.9	+	4.49	0.000252
response to inorganic substance (GO:0010035)	892	35	14.54	+	2.41	0.00907	defense response, incompatible interaction (GO:0009814)	174	33	12.73	+	2.59	0.0134
response to oxidative stress (GO:0006979)	392	21	6.39	+	3.29	0.0111	indole-containing compound metabolic process (GO:0042430)	71	19	5.19	+	3.66	0.0232
response to salicylic acid (GO:0009751)	206	14	3.36	+	4.17	0.0393	protein phosphorylation (GO:0006468)	799	138	58.43	+	2.36	1.75e-14
response to wounding (GO:0009611)	207	20	3.38	+	5.93	2.51e-06	response to acid chemical (GO:0001101)	1126	133	82.35	+	1.62	0.00117
signal transduction (GO:0007165)	1300	54	21.2	+	2.55	2.65e-06	response to antibiotic (GO:0046677)	286	51	20.92	+	2.44	0.000234
							response to chitin (GO:0010200)	137	36	10.02	+	3.59	4.08e-06
							response to endoplasmic reticulum stress (GO:0034976)	97	28	7.09	+	3.95	4.88e-05
							response to hormone (GO:0009725)	1360	150	99.46	+	1.51	0.00781
							response to oxidative stress (GO:0006979)	392	57	28.67	+	1.99	0.0189
							response to toxic substance (GO:0009636)	187	34	13.68	+	2.49	0.0271
							signal transduction (GO:0007165)	1300	184	95.07	+	1.94	4.25e-12

## Sheet: STm 14028s_Up_4 HPI
Dataset S10. Overrepresented gene ontology terms from up and downregulated genes that overlap between Arabidopsis and lettuce plants inoculated with 1 x 109 CFU/mL of Escherichia coli O157:H7 or Salmonella enterica Typhimurium 14028s at 4 and 24 hours post inoculation (HPI).
Shared							Arabidopsis Specific							Lettuce Specific
ALL GO TERMS							ALL GO TERMS							ALL GO TERMS
Analysis Type:	PANTHER Overrepresentation Test (Released 20190711)						Analysis Type:	PANTHER Overrepresentation Test (Released 20190711)						Analysis Type:	PANTHER Overrepresentation Test (Released 20190711)
Annotation Version and Release Date:	GO Ontology database Released 2019-12-09						Annotation Version and Release Date:	GO Ontology database Released 2019-12-09						Annotation Version and Release Date:	GO Ontology database Released 2019-12-09
Analyzed List:	upload_1 (Arabidopsis thaliana)						Analyzed List:	upload_1 (Arabidopsis thaliana)						Analyzed List:	upload_1 (Arabidopsis thaliana)
Reference List:	Arabidopsis thaliana (all genes in database)						Reference List:	Arabidopsis thaliana (all genes in database)						Reference List:	Arabidopsis thaliana (all genes in database)
Test Type:	FISHER						Test Type:	FISHER						Test Type:	FISHER
Correction:	BONFERRONI						Correction:	BONFERRONI						Correction:	BONFERRONI
Bonferroni count:	2757						Bonferroni count:	2757						Bonferroni count:	2757
GO biological process complete	Arabidopsis thaliana - REFLIST (27416)	upload_1 (291)	upload_1 (expected)	upload_1 (over/under)	upload_1 (fold Enrichment)	upload_1 (P-value)	GO biological process complete	Arabidopsis thaliana - REFLIST (27416)	upload_1 (1973)	upload_1 (expected)	upload_1 (over/under)	upload_1 (fold Enrichment)	upload_1 (P-value)	GO biological process complete	Arabidopsis thaliana - REFLIST (27416)	upload_1 (752)	upload_1 (expected)	upload_1 (over/under)	upload_1 (fold Enrichment)	upload_1 (P-value)
carboxylic acid metabolic process (GO:0019752)	825	24	8.76	+	2.74	0.0344	activation of immune response (GO:0002253)	62	18	4.46	+	4.03	0.0126	amide biosynthetic process (GO:0043604)	502	84	13.77	+	6.1	1.84e-33
cellular aromatic compound metabolic process (GO:0006725)	2380	51	25.26	+	2.02	0.00503	activation of innate immune response (GO:0002218)	61	18	4.39	+	4.1	0.0104	biosynthetic process (GO:0009058)	2441	147	66.95	+	2.2	2.51e-15
cellular component biogenesis (GO:0044085)	1167	35	12.39	+	2.83	0.000153	biological regulation (GO:0065007)	5644	539	406.17	+	1.33	1.66e-08	cellular amide metabolic process (GO:0043603)	642	89	17.61	+	5.05	4.88e-30
cellular process (GO:0009987)	10043	154	106.6	+	1.44	5.68e-05	cell communication (GO:0007154)	1560	221	112.27	+	1.97	5.7e-16	cellular aromatic compound metabolic process (GO:0006725)	2380	142	65.28	+	2.18	2.19e-14
cellular response to stimulus (GO:0051716)	2416	50	25.64	+	1.95	0.0171	cellular macromolecule metabolic process (GO:0044260)	3591	332	258.43	+	1.28	0.0138	cellular biosynthetic process (GO:0044249)	2262	143	62.04	+	2.3	1.27e-16
cellular response to stress (GO:0033554)	1139	34	12.09	+	2.81	0.000268	cellular metabolic process (GO:0044237)	6800	586	489.36	+	1.2	0.00533	cellular component biogenesis (GO:0044085)	1167	115	32.01	+	3.59	2.95e-27
cellular response to unfolded protein (GO:0034620)	51	7	0.54	+	12.93	0.00688	cellular process (GO:0009987)	10043	925	722.75	+	1.28	8.34e-16	cellular component organization (GO:0016043)	2503	111	68.66	+	1.62	0.00299
chaperone-mediated protein folding (GO:0061077)	62	7	0.66	+	10.64	0.0224	cellular protein metabolic process (GO:0044267)	2699	282	194.23	+	1.45	5.25e-06	cellular component organization or biogenesis (GO:0071840)	2822	178	77.41	+	2.3	9.91e-22
'de novo' protein folding (GO:0006458)	57	7	0.61	+	11.57	0.0135	cellular protein modification process (GO:0006464)	1891	237	136.09	+	1.74	1.19e-11	cellular macromolecule biosynthetic process (GO:0034645)	1018	95	27.92	+	3.4	2.54e-20
defense response (GO:0006952)	1005	28	10.67	+	2.62	0.014	cellular response to chemical stimulus (GO:0070887)	1128	180	81.18	+	2.22	4.61e-17	cellular macromolecule metabolic process (GO:0044260)	3591	166	98.5	+	1.69	8.69e-08
endoplasmic reticulum unfolded protein response (GO:0030968)	36	6	0.38	+	15.7	0.0134	cellular response to decreased oxygen levels (GO:0036294)	236	80	16.98	+	4.71	3.33e-22	cellular metabolic process (GO:0044237)	6800	306	186.52	+	1.64	1.68e-17
gene expression (GO:0010467)	1403	37	14.89	+	2.48	0.00184	cellular response to hypoxia (GO:0071456)	234	79	16.84	+	4.69	8.32e-22	cellular nitrogen compound biosynthetic process (GO:0044271)	1022	99	28.03	+	3.53	1.94e-22
lignin metabolic process (GO:0009808)	66	7	0.7	+	9.99	0.0326	cellular response to organic substance (GO:0071310)	755	90	54.33	+	1.66	0.0381	cellular nitrogen compound metabolic process (GO:0034641)	2671	202	73.26	+	2.76	6.55e-36
maturation of LSU-rRNA (GO:0000470)	46	6	0.49	+	12.29	0.0477	cellular response to oxygen levels (GO:0071453)	236	80	16.98	+	4.71	3.33e-22	cellular process (GO:0009987)	10043	405	275.47	+	1.47	1.14e-17
multi-organism process (GO:0051704)	1495	41	15.87	+	2.58	0.000111	cellular response to stimulus (GO:0051716)	2416	355	173.87	+	2.04	4.91e-31	cellular protein metabolic process (GO:0044267)	2699	132	74.03	+	1.78	4.5e-07
ncRNA metabolic process (GO:0034660)	407	25	4.32	+	5.79	1.81e-08	cellular response to stress (GO:0033554)	1139	187	81.97	+	2.28	4.79e-19	cellular protein-containing complex assembly (GO:0034622)	429	31	11.77	+	2.63	0.00779
ncRNA processing (GO:0034470)	344	24	3.65	+	6.57	3.92e-09	defense response (GO:0006952)	1005	171	72.33	+	2.36	1.1e-18	cytoplasmic translation (GO:0002181)	71	19	1.95	+	9.76	6.79e-09
organic acid metabolic process (GO:0006082)	956	27	10.15	+	2.66	0.0163	defense response to bacterium (GO:0042742)	394	80	28.35	+	2.82	6.62e-11	embryo development (GO:0009790)	558	40	15.31	+	2.61	0.000567
organic cyclic compound metabolic process (GO:1901360)	2471	51	26.23	+	1.94	0.0137	defense response to other organism (GO:0098542)	764	140	54.98	+	2.55	3.11e-17	embryo development ending in seed dormancy (GO:0009793)	536	37	14.7	+	2.52	0.00286
oxoacid metabolic process (GO:0043436)	949	27	10.07	+	2.68	0.0144	gene expression (GO:0010467)	1403	48	100.97	-	0.48	2.61e-05	gene expression (GO:0010467)	1403	160	38.48	+	4.16	2.39e-47
protein folding (GO:0006457)	169	14	1.79	+	7.8	2.67e-05	immune response (GO:0006955)	304	61	21.88	+	2.79	1.28e-07	heterocycle metabolic process (GO:0046483)	2256	129	61.88	+	2.08	2.14e-11
response to abiotic stimulus (GO:0009628)	2062	50	21.89	+	2.28	0.000212	immune system process (GO:0002376)	372	81	26.77	+	3.03	1.35e-12	macromolecule biosynthetic process (GO:0009059)	1062	97	29.13	+	3.33	3.45e-20
response to biotic stimulus (GO:0009607)	1022	34	10.85	+	3.13	2.12e-05	indole-containing compound biosynthetic process (GO:0042435)	49	15	3.53	+	4.25	0.0459	macromolecule metabolic process (GO:0043170)	4696	241	128.81	+	1.87	3.51e-19
response to chemical (GO:0042221)	2661	72	28.24	+	2.55	5.56e-10	indole-containing compound metabolic process (GO:0042430)	71	21	5.11	+	4.11	0.00161	macromolecule methylation (GO:0043414)	175	19	4.8	+	3.96	0.00344
response to chitin (GO:0010200)	137	13	1.45	+	8.94	2.03e-05	innate immune response (GO:0045087)	300	61	21.59	+	2.83	9.59e-08	maturation of LSU-rRNA (GO:0000470)	46	12	1.26	+	9.51	9.59e-05
response to drug (GO:0042493)	501	24	5.32	+	4.51	5.74e-06	intracellular signal transduction (GO:0035556)	465	71	33.46	+	2.12	0.000115	maturation of SSU-rRNA (GO:0030490)	52	22	1.43	+	15.42	4.86e-14
response to endoplasmic reticulum stress (GO:0034976)	97	9	1.03	+	8.74	0.00511	macromolecule modification (GO:0043412)	2295	245	165.16	+	1.48	1.2e-05	maturation of SSU-rRNA from tricistronic rRNA transcript (SSU-rRNA, 5.8S rRNA, LSU-rRNA) (GO:0000462)	35	16	0.96	+	16.67	4.71e-10
response to external biotic stimulus (GO:0043207)	1021	34	10.84	+	3.14	2.07e-05	metabolic process (GO:0008152)	7731	670	556.36	+	1.2	0.000215	metabolic process (GO:0008152)	7731	336	212.06	+	1.58	8.06e-18
response to external stimulus (GO:0009605)	1424	38	15.11	+	2.51	0.00108	multi-organism process (GO:0051704)	1495	232	107.59	+	2.16	1.97e-21	ncRNA metabolic process (GO:0034660)	407	72	11.16	+	6.45	1.31e-29
response to heat (GO:0009408)	205	14	2.18	+	6.43	0.000257	nucleic acid metabolic process (GO:0090304)	1629	63	117.23	-	0.54	0.000204	ncRNA processing (GO:0034470)	344	67	9.44	+	7.1	1.49e-29
response to inorganic substance (GO:0010035)	892	27	9.47	+	2.85	0.00472	organic substance metabolic process (GO:0071704)	6774	575	487.49	+	1.18	0.045	nitrogen compound metabolic process (GO:0006807)	5422	268	148.72	+	1.8	6.39e-20
response to nitrogen compound (GO:1901698)	291	19	3.09	+	6.15	2.55e-06	organonitrogen compound metabolic process (GO:1901564)	3927	395	282.61	+	1.4	9.01e-08	nuclear transport (GO:0051169)	105	17	2.88	+	5.9	7.71e-05
response to organonitrogen compound (GO:0010243)	242	18	2.57	+	7.01	1.02e-06	phosphate-containing compound metabolic process (GO:0006796)	1575	218	113.35	+	1.92	1.14e-14	nucleic acid metabolic process (GO:0090304)	1629	109	44.68	+	2.44	2.26e-13
response to other organism (GO:0051707)	1021	34	10.84	+	3.14	2.07e-05	phosphorus metabolic process (GO:0006793)	1615	227	116.22	+	1.95	3.69e-16	nucleobase-containing compound metabolic process (GO:0006139)	1966	122	53.93	+	2.26	4.76e-13
response to oxygen-containing compound (GO:1901700)	1504	38	15.96	+	2.38	0.0028	phosphorylation (GO:0016310)	1111	173	79.95	+	2.16	1.99e-15	nucleocytoplasmic transport (GO:0006913)	105	17	2.88	+	5.9	7.71e-05
response to stimulus (GO:0050896)	5327	118	56.54	+	2.09	4.91e-13	positive regulation of defense response (GO:0031349)	107	28	7.7	+	3.64	0.000206	organelle assembly (GO:0070925)	175	22	4.8	+	4.58	4.83e-05
response to stress (GO:0006950)	3079	87	32.68	+	2.66	2.85e-14	positive regulation of immune response (GO:0050778)	77	23	5.54	+	4.15	0.000411	organelle organization (GO:0006996)	1608	79	44.11	+	1.79	0.00311
response to temperature stimulus (GO:0009266)	579	22	6.15	+	3.58	0.00131	positive regulation of immune system process (GO:0002684)	77	23	5.54	+	4.15	0.000411	organic cyclic compound metabolic process (GO:1901360)	2471	145	67.78	+	2.14	4.2e-14
response to unfolded protein (GO:0006986)	51	7	0.54	+	12.93	0.00688	positive regulation of innate immune response (GO:0045089)	77	23	5.54	+	4.15	0.000411	organic substance biosynthetic process (GO:1901576)	2296	145	62.98	+	2.3	6.81e-17
response to wounding (GO:0009611)	207	15	2.2	+	6.83	4.24e-05	positive regulation of multi-organism process (GO:0043902)	100	28	7.2	+	3.89	6.13e-05	organic substance metabolic process (GO:0071704)	6774	310	185.81	+	1.67	4.96e-19
ribonucleoprotein complex biogenesis (GO:0022613)	422	29	4.48	+	6.47	2.34e-11	positive regulation of response to biotic stimulus (GO:0002833)	99	28	7.12	+	3.93	5.11e-05	organonitrogen compound biosynthetic process (GO:1901566)	1157	110	31.74	+	3.47	1.08e-24
ribosomal large subunit biogenesis (GO:0042273)	107	10	1.14	+	8.8	0.00128	positive regulation of response to external stimulus (GO:0032103)	102	28	7.34	+	3.81	8.75e-05	organonitrogen compound metabolic process (GO:1901564)	3927	174	107.71	+	1.62	6.45e-07
ribosome biogenesis (GO:0042254)	351	29	3.73	+	7.78	2.64e-13	positive regulation of response to stimulus (GO:0048584)	243	44	17.49	+	2.52	0.000813	peptide biosynthetic process (GO:0043043)	436	82	11.96	+	6.86	7.55e-36
RNA metabolic process (GO:0016070)	1227	31	13.02	+	2.38	0.0322	protein autophosphorylation (GO:0046777)	183	40	13.17	+	3.04	3.09e-05	peptide metabolic process (GO:0006518)	516	83	14.15	+	5.86	6.42e-32
RNA processing (GO:0006396)	756	28	8.02	+	3.49	5.67e-05	protein metabolic process (GO:0019538)	2940	300	211.58	+	1.42	1.27e-05	primary metabolic process (GO:0044238)	6105	288	167.46	+	1.72	5.1e-19
rRNA metabolic process (GO:0016072)	242	24	2.57	+	9.34	3.11e-12	protein modification process (GO:0036211)	1891	237	136.09	+	1.74	1.19e-11	protein alkylation (GO:0008213)	73	11	2	+	5.49	0.0398
rRNA processing (GO:0006364)	236	24	2.5	+	9.58	1.85e-12	protein phosphorylation (GO:0006468)	799	138	57.5	+	2.4	4.98e-15	protein metabolic process (GO:0019538)	2940	137	80.64	+	1.7	4.38e-06
small molecule metabolic process (GO:0044281)	1400	37	14.86	+	2.49	0.00179	regulation of biological process (GO:0050789)	4941	466	355.58	+	1.31	5.48e-06	protein methylation (GO:0006479)	73	11	2	+	5.49	0.0398
Unclassified (UNCLASSIFIED)	6685	45	70.96	-	0.63	0	regulation of cellular process (GO:0050794)	4297	409	309.23	+	1.32	2.74e-05	protein-containing complex assembly (GO:0065003)	479	35	13.14	+	2.66	0.00142
CHILD GO TERMS REPRESENTING HIERARCHICAL CATEGORIES							regulation of defense response (GO:0031347)	259	58	18.64	+	3.11	7.32e-09	protein-containing complex subunit organization (GO:0043933)	554	35	15.2	+	2.3	0.0343
carboxylic acid metabolic process (GO:0019752)	825	24	8.76	+	2.74	0.0344	regulation of immune response (GO:0050776)	130	35	9.36	+	3.74	2.7e-06	ribonucleoprotein complex assembly (GO:0022618)	154	27	4.22	+	6.39	1.28e-09
chaperone-mediated protein folding (GO:0061077)	62	7	0.66	+	10.64	0.0224	regulation of immune system process (GO:0002682)	141	38	10.15	+	3.74	5.13e-07	ribonucleoprotein complex biogenesis (GO:0022613)	422	96	11.58	+	8.29	7.53e-49
'de novo' protein folding (GO:0006458)	57	7	0.61	+	11.57	0.0135	regulation of innate immune response (GO:0045088)	126	35	9.07	+	3.86	1.34e-06	ribonucleoprotein complex subunit organization (GO:0071826)	157	27	4.31	+	6.27	1.91e-09
defense response (GO:0006952)	1005	28	10.67	+	2.62	0.014	regulation of multi-organism process (GO:0043900)	280	54	20.15	+	2.68	4.9e-06	ribosomal large subunit assembly (GO:0000027)	43	14	1.18	+	11.87	6.08e-07
endoplasmic reticulum unfolded protein response (GO:0030968)	36	6	0.38	+	15.7	0.0134	regulation of response to biotic stimulus (GO:0002831)	184	49	13.24	+	3.7	1.83e-09	ribosomal large subunit biogenesis (GO:0042273)	107	35	2.93	+	11.93	1.54e-20
lignin metabolic process (GO:0009808)	66	7	0.7	+	9.99	0.0326	regulation of response to external stimulus (GO:0032101)	189	50	13.6	+	3.68	1.32e-09	ribosomal small subunit biogenesis (GO:0042274)	86	31	2.36	+	13.14	5.7e-19
maturation of LSU-rRNA (GO:0000470)	46	6	0.49	+	12.29	0.0477	regulation of response to stimulus (GO:0048583)	691	105	49.73	+	2.11	8.6e-08	ribosome assembly (GO:0042255)	85	22	2.33	+	9.44	2.25e-10
response to chitin (GO:0010200)	137	13	1.45	+	8.94	2.03e-05	regulation of response to stress (GO:0080134)	374	73	26.92	+	2.71	6.43e-09	ribosome biogenesis (GO:0042254)	351	91	9.63	+	9.45	3.2e-50
response to heat (GO:0009408)	205	14	2.18	+	6.43	0.000257	response to abiotic stimulus (GO:0009628)	2062	267	148.39	+	1.8	3.7e-15	RNA export from nucleus (GO:0006405)	59	10	1.62	+	6.18	0.0392
response to inorganic substance (GO:0010035)	892	27	9.47	+	2.85	0.00472	response to abscisic acid (GO:0009737)	524	72	37.71	+	1.91	0.00352	RNA metabolic process (GO:0016070)	1227	96	33.66	+	2.85	1.3e-15
response to other organism (GO:0051707)	1021	34	10.84	+	3.14	2.07e-05	response to acid chemical (GO:0001101)	1126	163	81.03	+	2.01	1.14e-11	RNA processing (GO:0006396)	756	79	20.74	+	3.81	3.85e-19
response to wounding (GO:0009611)	207	15	2.2	+	6.83	4.24e-05	response to alcohol (GO:0097305)	528	72	38	+	1.89	0.00553	rRNA metabolic process (GO:0016072)	242	61	6.64	+	9.19	4.56e-32
							response to antibiotic (GO:0046677)	286	50	20.58	+	2.43	0.00034	rRNA modification (GO:0000154)	40	9	1.1	+	8.2	0.0143
							response to bacterium (GO:0009617)	477	105	34.33	+	3.06	2.87e-17	rRNA processing (GO:0006364)	236	61	6.47	+	9.42	1.36e-32
							response to biotic stimulus (GO:0009607)	1022	196	73.55	+	2.66	1.54e-27	system development (GO:0048731)	1809	85	49.62	+	1.71	0.00755
							response to chemical (GO:0042221)	2661	400	191.5	+	2.09	8.7e-38	translation (GO:0006412)	431	81	11.82	+	6.85	2.37e-35
							response to chitin (GO:0010200)	137	50	9.86	+	5.07	3.58e-14	Unclassified (UNCLASSIFIED)	6685	146	183.36	-	0.8	0
							response to decreased oxygen levels (GO:0036293)	263	82	18.93	+	4.33	7.59e-21	CHILD GO TERMS REPRESENTING HIERARCHICAL CATEGORIES
							response to drug (GO:0042493)	501	105	36.05	+	2.91	6.23e-16	cytoplasmic translation (GO:0002181)	71	19	1.95	+	9.76	6.79e-09
							response to endogenous stimulus (GO:0009719)	1378	174	99.17	+	1.75	4.81e-08	embryo development ending in seed dormancy (GO:0009793)	536	37	14.7	+	2.52	0.00286
							response to external biotic stimulus (GO:0043207)	1021	196	73.48	+	2.67	1.41e-27	maturation of LSU-rRNA (GO:0000470)	46	12	1.26	+	9.51	9.59e-05
							response to external stimulus (GO:0009605)	1424	228	102.48	+	2.22	9.96e-23	maturation of SSU-rRNA from tricistronic rRNA transcript (SSU-rRNA, 5.8S rRNA, LSU-rRNA) (GO:0000462)	35	16	0.96	+	16.67	4.71e-10
							response to fungus (GO:0009620)	321	59	23.1	+	2.55	4.37e-06	protein methylation (GO:0006479)	73	11	2	+	5.49	0.0398
							response to hormone (GO:0009725)	1360	171	97.87	+	1.75	1.05e-07	ribosomal large subunit assembly (GO:0000027)	43	14	1.18	+	11.87	6.08e-07
							response to hypoxia (GO:0001666)	259	81	18.64	+	4.35	1.23e-20	rRNA modification (GO:0000154)	40	9	1.1	+	8.2	0.0143
							response to inorganic substance (GO:0010035)	892	123	64.19	+	1.92	4.6e-07
							response to jasmonic acid (GO:0009753)	217	37	15.62	+	2.37	0.0307
							response to metal ion (GO:0010038)	456	65	32.82	+	1.98	0.00385
							response to molecule of bacterial origin (GO:0002237)	34	14	2.45	+	5.72	0.00547
							response to nitrogen compound (GO:1901698)	291	65	20.94	+	3.1	3.93e-10
							response to oomycetes (GO:0002239)	87	24	6.26	+	3.83	0.000763
							response to organic substance (GO:0010033)	1712	250	123.2	+	2.03	4.08e-20
							response to organonitrogen compound (GO:0010243)	242	61	17.42	+	3.5	2.35e-11
							response to osmotic stress (GO:0006970)	545	71	39.22	+	1.81	0.0253
							response to other organism (GO:0051707)	1021	196	73.48	+	2.67	1.41e-27
							response to oxygen levels (GO:0070482)	264	82	19	+	4.32	9.31e-21
							response to oxygen-containing compound (GO:1901700)	1504	223	108.24	+	2.06	3.06e-18
							response to stimulus (GO:0050896)	5327	698	383.36	+	1.82	1.65e-53
							response to stress (GO:0006950)	3079	438	221.58	+	1.98	8.57e-37
							response to wounding (GO:0009611)	207	50	14.9	+	3.36	2.28e-08
							RNA metabolic process (GO:0016070)	1227	33	88.3	-	0.37	1.01e-07
							RNA processing (GO:0006396)	756	25	54.41	-	0.46	0.0474
							signal transduction (GO:0007165)	1300	192	93.55	+	2.05	4.19e-15
							signaling (GO:0023052)	1334	192	96	+	2	4.29e-14
							Unclassified (UNCLASSIFIED)	6685	402	481.09	-	0.84	0
							CHILD GO TERMS REPRESENTING HIERARCHICAL CATEGORIES
							activation of innate immune response (GO:0002218)	61	18	4.39	+	4.1	0.0104
							cellular response to hypoxia (GO:0071456)	234	79	16.84	+	4.69	8.32e-22
							cellular response to organic substance (GO:0071310)	755	90	54.33	+	1.66	0.0381
							defense response to bacterium (GO:0042742)	394	80	28.35	+	2.82	6.62e-11
							indole-containing compound biosynthetic process (GO:0042435)	49	15	3.53	+	4.25	0.0459
							innate immune response (GO:0045087)	300	61	21.59	+	2.83	9.59e-08
							intracellular signal transduction (GO:0035556)	465	71	33.46	+	2.12	0.000115
							protein autophosphorylation (GO:0046777)	183	40	13.17	+	3.04	3.09e-05
							response to abscisic acid (GO:0009737)	524	72	37.71	+	1.91	0.00352
							response to antibiotic (GO:0046677)	286	50	20.58	+	2.43	0.00034
							response to chitin (GO:0010200)	137	50	9.86	+	5.07	3.58e-14
							response to fungus (GO:0009620)	321	59	23.1	+	2.55	4.37e-06
							response to jasmonic acid (GO:0009753)	217	37	15.62	+	2.37	0.0307
							response to metal ion (GO:0010038)	456	65	32.82	+	1.98	0.00385
							response to molecule of bacterial origin (GO:0002237)	34	14	2.45	+	5.72	0.00547
							response to oomycetes (GO:0002239)	87	24	6.26	+	3.83	0.000763
							response to osmotic stress (GO:0006970)	545	71	39.22	+	1.81	0.0253
							response to wounding (GO:0009611)	207	50	14.9	+	3.36	2.28e-08

## Sheet: STm 14028s_Up_24 HPI
Dataset S10. Overrepresented gene ontology terms from up and downregulated genes that overlap between Arabidopsis and lettuce plants inoculated with 1 x 109 CFU/mL of Escherichia coli O157:H7 or Salmonella enterica Typhimurium 14028s at 4 and 24 hours post inoculation (HPI).
Shared							Arabidopsis Specific							Lettuce Specific
ALL GO TERMS							ALL GO TERMS							ALL GO TERMS
Analysis Type:	PANTHER Overrepresentation Test (Released 20190711)						Analysis Type:	PANTHER Overrepresentation Test (Released 20190711)						Analysis Type:	PANTHER Overrepresentation Test (Released 20190711)
Annotation Version and Release Date:	GO Ontology database Released 2019-12-09						Annotation Version and Release Date:	GO Ontology database Released 2019-12-09						Annotation Version and Release Date:	GO Ontology database Released 2019-12-09
Analyzed List:	upload_1 (Arabidopsis thaliana)						Analyzed List:	upload_1 (Arabidopsis thaliana)						Analyzed List:	upload_1 (Arabidopsis thaliana)
Reference List:	Arabidopsis thaliana (all genes in database)						Reference List:	Arabidopsis thaliana (all genes in database)						Reference List:	Arabidopsis thaliana (all genes in database)
Test Type:	FISHER						Test Type:	FISHER						Test Type:	FISHER
Correction:	BONFERRONI						Correction:	BONFERRONI						Correction:	BONFERRONI
Bonferroni count:	2757						Bonferroni count:	2757						Bonferroni count:	2757
GO biological process complete	Arabidopsis thaliana - REFLIST (27416)	upload_1 (643)	upload_1 (expected)	upload_1 (over/under)	upload_1 (fold Enrichment)	upload_1 (P-value)	GO biological process complete	Arabidopsis thaliana - REFLIST (27416)	upload_1 (2212)	upload_1 (expected)	upload_1 (over/under)	upload_1 (fold Enrichment)	upload_1 (P-value)	GO biological process complete	Arabidopsis thaliana - REFLIST (27416)	upload_1 (1272)	upload_1 (expected)	upload_1 (over/under)	upload_1 (fold Enrichment)	upload_1 (P-value)
aging (GO:0007568)	133	15	3.12	+	4.81	0.00469	amide biosynthetic process (GO:0043604)	502	13	40.5	-	0.32	0.00459	acyl-CoA metabolic process (GO:0006637)	42	11	1.95	+	5.64	0.0471
biological regulation (GO:0065007)	5644	187	132.37	+	1.41	0.00131	biological regulation (GO:0065007)	5644	568	455.37	+	1.25	9.37e-05	aging (GO:0007568)	133	20	6.17	+	3.24	0.0415
cell communication (GO:0007154)	1560	84	36.59	+	2.3	1.57e-08	cell communication (GO:0007154)	1560	223	125.87	+	1.77	2.89e-11	biological regulation (GO:0065007)	5644	345	261.86	+	1.32	0.000142
cell death (GO:0008219)	112	16	2.63	+	6.09	0.000115	cell recognition (GO:0008037)	41	15	3.31	+	4.53	0.0284	carboxylic acid catabolic process (GO:0046395)	133	22	6.17	+	3.57	0.00399
cellular nitrogen compound metabolic process (GO:0034641)	2671	29	62.64	-	0.46	0.00376	cellular macromolecule localization (GO:0070727)	683	92	55.11	+	1.67	0.0308	carboxylic acid metabolic process (GO:0019752)	825	76	38.28	+	1.99	0.00026
cellular process (GO:0009987)	10043	311	235.54	+	1.32	6.15e-06	cellular nitrogen compound metabolic process (GO:0034641)	2671	144	215.5	-	0.67	0.000622	catabolic process (GO:0009056)	1488	133	69.04	+	1.93	1.92e-08
cellular protein metabolic process (GO:0044267)	2699	105	63.3	+	1.66	0.00136	cellular process (GO:0009987)	10043	945	810.3	+	1.17	4.26e-05	cell communication (GO:0007154)	1560	131	72.38	+	1.81	1.01e-06
cellular protein modification process (GO:0006464)	1891	96	44.35	+	2.16	8.53e-09	cellular protein metabolic process (GO:0044267)	2699	299	217.76	+	1.37	0.000337	cellular catabolic process (GO:0044248)	1260	114	58.46	+	1.95	2.9e-07
cellular response to chemical stimulus (GO:0070887)	1128	81	26.46	+	3.06	1.26e-14	cellular protein modification process (GO:0006464)	1891	248	152.57	+	1.63	3.86e-09	cellular lipid metabolic process (GO:0044255)	624	73	28.95	+	2.52	3.01e-08
cellular response to decreased oxygen levels (GO:0036294)	236	30	5.54	+	5.42	2.2e-09	cellular response to chemical stimulus (GO:0070887)	1128	157	91.01	+	1.73	2.51e-06	cellular macromolecule catabolic process (GO:0044265)	718	67	33.31	+	2.01	0.00101
cellular response to endogenous stimulus (GO:0071495)	643	37	15.08	+	2.45	0.00409	cellular response to decreased oxygen levels (GO:0036294)	236	65	19.04	+	3.41	1.38e-11	cellular metabolic process (GO:0044237)	6800	396	315.49	+	1.26	0.00183
cellular response to hormone stimulus (GO:0032870)	624	36	14.63	+	2.46	0.00547	cellular response to hypoxia (GO:0071456)	234	65	18.88	+	3.44	9.85e-12	cellular process (GO:0009987)	10043	608	465.96	+	1.3	6.2e-12
cellular response to hypoxia (GO:0071456)	234	29	5.49	+	5.28	9.37e-09	cellular response to oxygen levels (GO:0071453)	236	65	19.04	+	3.41	1.38e-11	cellular response to acid chemical (GO:0071229)	354	38	16.42	+	2.31	0.0254
cellular response to organic substance (GO:0071310)	755	48	17.71	+	2.71	5.2e-06	cellular response to stimulus (GO:0051716)	2416	328	194.93	+	1.68	5.47e-15	cellular response to chemical stimulus (GO:0070887)	1128	109	52.33	+	2.08	2.48e-08
cellular response to oxygen levels (GO:0071453)	236	30	5.54	+	5.42	2.2e-09	cellular response to stress (GO:0033554)	1139	166	91.9	+	1.81	2.97e-08	cellular response to endogenous stimulus (GO:0071495)	643	64	29.83	+	2.15	0.000217
cellular response to stimulus (GO:0051716)	2416	138	56.66	+	2.44	1.95e-18	defense response (GO:0006952)	1005	189	81.09	+	2.33	7.21e-20	cellular response to ethylene stimulus (GO:0071369)	103	18	4.78	+	3.77	0.018
cellular response to stress (GO:0033554)	1139	74	26.71	+	2.77	5.36e-11	defense response to bacterium (GO:0042742)	394	89	31.79	+	2.8	4.56e-12	cellular response to hormone stimulus (GO:0032870)	624	57	28.95	+	1.97	0.013
cellular response to topologically incorrect protein (GO:0035967)	74	11	1.74	+	6.34	0.0106	defense response to fungus (GO:0050832)	244	46	19.69	+	2.34	0.00378	cellular response to organic substance (GO:0071310)	755	74	35.03	+	2.11	4.06e-05
defense response (GO:0006952)	1005	78	23.57	+	3.31	8.79e-16	defense response to oomycetes (GO:0002229)	67	19	5.41	+	3.51	0.0423	cellular response to oxygen-containing compound (GO:1901701)	500	57	23.2	+	2.46	1.34e-05
defense response to bacterium (GO:0042742)	394	36	9.24	+	3.9	8.03e-08	defense response to other organism (GO:0098542)	764	159	61.64	+	2.58	5.55e-20	cellular response to stimulus (GO:0051716)	2416	199	112.09	+	1.78	5.86e-11
defense response to fungus (GO:0050832)	244	25	5.72	+	4.37	1.06e-05	defense response, incompatible interaction (GO:0009814)	174	36	14.04	+	2.56	0.0104	cellular response to stress (GO:0033554)	1139	94	52.85	+	1.78	0.000801
defense response to other organism (GO:0098542)	764	63	17.92	+	3.52	2.16e-13	establishment of localization (GO:0051234)	2132	244	172.02	+	1.42	0.000602	defense response (GO:0006952)	1005	96	46.63	+	2.06	8.36e-07
defense response, incompatible interaction (GO:0009814)	174	16	4.08	+	3.92	0.024	establishment of protein localization (GO:0045184)	701	93	56.56	+	1.64	0.0406	defense response to other organism (GO:0098542)	764	72	35.45	+	2.03	0.000229
gene expression (GO:0010467)	1403	6	32.91	-	0.18	3.92e-05	gene expression (GO:0010467)	1403	41	113.2	-	0.36	4.68e-11	developmental process (GO:0032502)	3065	196	142.2	+	1.38	0.0247
host programmed cell death induced by symbiont (GO:0034050)	58	12	1.36	+	8.82	0.000165	heterocycle metabolic process (GO:0046483)	2256	122	182.02	-	0.67	0.00756	endocytosis (GO:0006897)	58	15	2.69	+	5.57	0.00165
immune response (GO:0006955)	304	31	7.13	+	4.35	1.6e-07	immune response (GO:0006955)	304	66	24.53	+	2.69	1.12e-07	establishment of localization (GO:0051234)	2132	159	98.92	+	1.61	3.45e-05
immune system process (GO:0002376)	372	39	8.72	+	4.47	2.31e-10	immune system process (GO:0002376)	372	79	30.01	+	2.63	3.66e-09	ethylene-activated signaling pathway (GO:0009873)	95	18	4.41	+	4.08	0.00666
innate immune response (GO:0045087)	300	30	7.04	+	4.26	5.05e-07	indole-containing compound metabolic process (GO:0042430)	71	23	5.73	+	4.02	0.000819	fatty acid metabolic process (GO:0006631)	201	30	9.33	+	3.22	0.000397
leaf senescence (GO:0010150)	103	13	2.42	+	5.38	0.00745	innate immune response (GO:0045087)	300	66	24.2	+	2.73	8.64e-08	gene expression (GO:0010467)	1403	19	65.09	-	0.29	9.32e-08
macromolecule modification (GO:0043412)	2295	96	53.83	+	1.78	0.000172	localization (GO:0051179)	2285	261	184.36	+	1.42	0.000257	immune response (GO:0006955)	304	37	14.1	+	2.62	0.00203
multi-organism cellular process (GO:0044764)	84	12	1.97	+	6.09	0.00564	macromolecule modification (GO:0043412)	2295	256	185.17	+	1.38	0.00218	immune system process (GO:0002376)	372	43	17.26	+	2.49	0.00103
multi-organism process (GO:0051704)	1495	102	35.06	+	2.91	1.03e-17	mRNA metabolic process (GO:0016071)	434	10	35.02	-	0.29	0.00705	import into cell (GO:0098657)	77	15	3.57	+	4.2	0.0338
nucleic acid metabolic process (GO:0090304)	1629	9	38.21	-	0.24	5.39e-05	multi-organism process (GO:0051704)	1495	235	120.62	+	1.95	2.23e-16	innate immune response (GO:0045087)	300	37	13.92	+	2.66	0.00173
nucleobase-containing compound metabolic process (GO:0006139)	1966	19	46.11	-	0.41	0.0211	ncRNA metabolic process (GO:0034660)	407	6	32.84	-	0.18	0.000121	intracellular signal transduction (GO:0035556)	465	47	21.57	+	2.18	0.00943
organonitrogen compound metabolic process (GO:1901564)	3927	142	92.1	+	1.54	0.000585	ncRNA processing (GO:0034470)	344	5	27.75	-	0.18	0.00149	lipid metabolic process (GO:0006629)	728	78	33.78	+	2.31	4.39e-07
phosphate-containing compound metabolic process (GO:0006796)	1575	76	36.94	+	2.06	2.07e-05	nucleic acid metabolic process (GO:0090304)	1629	54	131.43	-	0.41	1.14e-10	localization (GO:0051179)	2285	168	106.02	+	1.58	3.82e-05
phosphorus metabolic process (GO:0006793)	1615	81	37.88	+	2.14	1.22e-06	nucleobase-containing compound metabolic process (GO:0006139)	1966	85	158.62	-	0.54	6.15e-07	macromolecule catabolic process (GO:0009057)	861	73	39.95	+	1.83	0.00893
phosphorylation (GO:0016310)	1111	65	26.06	+	2.49	2.35e-07	organonitrogen compound metabolic process (GO:1901564)	3927	421	316.84	+	1.33	1.61e-05	metabolic process (GO:0008152)	7731	452	358.69	+	1.26	8.43e-05
plant organ senescence (GO:0090693)	109	13	2.56	+	5.09	0.0131	peptide biosynthetic process (GO:0043043)	436	9	35.18	-	0.26	0.00174	monocarboxylic acid metabolic process (GO:0032787)	423	51	19.63	+	2.6	1.68e-05
plant-type hypersensitive response (GO:0009626)	57	12	1.34	+	8.98	0.00014	phosphate-containing compound metabolic process (GO:0006796)	1575	223	127.08	+	1.75	7.61e-11	multi-organism process (GO:0051704)	1495	121	69.36	+	1.74	4.49e-05
programmed cell death (GO:0012501)	91	13	2.13	+	6.09	0.00213	phosphorus metabolic process (GO:0006793)	1615	229	130.3	+	1.76	2.57e-11	ncRNA metabolic process (GO:0034660)	407	2	18.88	-	0.11	0.00746
protein autophosphorylation (GO:0046777)	183	17	4.29	+	3.96	0.0112	phosphorylation (GO:0016310)	1111	179	89.64	+	2	1.24e-12	ncRNA processing (GO:0034470)	344	1	15.96	-	0.06	0.0124
protein metabolic process (GO:0019538)	2940	113	68.95	+	1.64	0.000689	plastid organization (GO:0009657)	298	4	24.04	-	0.17	0.00654	nucleic acid metabolic process (GO:0090304)	1629	27	75.58	-	0.36	4.4e-07
protein modification process (GO:0036211)	1891	96	44.35	+	2.16	8.53e-09	positive regulation of defense response (GO:0031349)	107	27	8.63	+	3.13	0.00511	organic acid catabolic process (GO:0016054)	133	22	6.17	+	3.57	0.00399
protein phosphorylation (GO:0006468)	799	54	18.74	+	2.88	5.77e-08	positive regulation of immune response (GO:0050778)	77	21	6.21	+	3.38	0.0255	organic acid metabolic process (GO:0006082)	956	88	44.35	+	1.98	2.49e-05
regulation of biological process (GO:0050789)	4941	162	115.88	+	1.4	0.0221	positive regulation of immune system process (GO:0002684)	77	21	6.21	+	3.38	0.0255	organic substance catabolic process (GO:1901575)	1299	120	60.27	+	1.99	3.38e-08
regulation of cellular process (GO:0050794)	4297	145	100.78	+	1.44	0.0187	positive regulation of innate immune response (GO:0045089)	77	21	6.21	+	3.38	0.0255	organic substance metabolic process (GO:0071704)	6774	408	314.29	+	1.3	2.13e-05
regulation of defense response (GO:0031347)	259	24	6.07	+	3.95	0.000128	positive regulation of multi-organism process (GO:0043902)	100	26	8.07	+	3.22	0.00493	organic substance transport (GO:0071702)	1128	87	52.33	+	1.66	0.0335
regulation of hormone metabolic process (GO:0032350)	61	10	1.43	+	6.99	0.0135	positive regulation of response to biotic stimulus (GO:0002833)	99	25	7.99	+	3.13	0.012	organonitrogen compound catabolic process (GO:1901565)	874	77	40.55	+	1.9	0.00097
regulation of jasmonic acid mediated signaling pathway (GO:2000022)	40	8	0.94	+	8.53	0.0337	positive regulation of response to external stimulus (GO:0032103)	102	25	8.23	+	3.04	0.0187	organonitrogen compound metabolic process (GO:1901564)	3927	258	182.2	+	1.42	5.06e-05
regulation of response to biotic stimulus (GO:0002831)	184	18	4.32	+	4.17	0.00297	protein localization (GO:0008104)	789	102	63.66	+	1.6	0.048	oxidation-reduction process (GO:0055114)	971	78	45.05	+	1.73	0.0225
regulation of response to external stimulus (GO:0032101)	189	19	4.43	+	4.29	0.00102	protein metabolic process (GO:0019538)	2940	318	237.21	+	1.34	0.00095	oxoacid metabolic process (GO:0043436)	949	87	44.03	+	1.98	3.52e-05
regulation of response to stimulus (GO:0048583)	691	42	16.21	+	2.59	0.000271	protein modification process (GO:0036211)	1891	248	152.57	+	1.63	3.86e-09	phenylpropanoid biosynthetic process (GO:0009699)	85	18	3.94	+	4.56	0.00165
regulation of response to stress (GO:0080134)	374	28	8.77	+	3.19	0.000642	protein phosphorylation (GO:0006468)	799	142	64.47	+	2.2	1.69e-12	phenylpropanoid metabolic process (GO:0009698)	115	19	5.34	+	3.56	0.0207
regulation of salicylic acid metabolic process (GO:0010337)	20	8	0.47	+	17.06	0.000416	recognition of pollen (GO:0048544)	39	15	3.15	+	4.77	0.0174	phosphate-containing compound metabolic process (GO:0006796)	1575	118	73.07	+	1.61	0.00272
response to abiotic stimulus (GO:0009628)	2062	105	48.36	+	2.17	6.22e-10	regulation of biological process (GO:0050789)	4941	489	398.65	+	1.23	0.00865	phosphorus metabolic process (GO:0006793)	1615	122	74.93	+	1.63	0.0014
response to abscisic acid (GO:0009737)	524	34	12.29	+	2.77	0.000807	regulation of defense response (GO:0031347)	259	54	20.9	+	2.58	1.96e-05	regulation of biological process (GO:0050789)	4941	298	229.24	+	1.3	0.00638
response to acid chemical (GO:0001101)	1126	71	26.41	+	2.69	7.43e-10	regulation of immune response (GO:0050776)	130	33	10.49	+	3.15	0.000344	regulation of biological quality (GO:0065008)	1152	92	53.45	+	1.72	0.00542
response to alcohol (GO:0097305)	528	34	12.38	+	2.75	0.000951	regulation of immune system process (GO:0002682)	141	35	11.38	+	3.08	0.000231	regulation of cellular process (GO:0050794)	4297	265	199.36	+	1.33	0.00546
response to antibiotic (GO:0046677)	286	21	6.71	+	3.13	0.0269	regulation of innate immune response (GO:0045088)	126	33	10.17	+	3.25	0.000185	response to abiotic stimulus (GO:0009628)	2062	163	95.67	+	1.7	4.91e-07
response to bacterium (GO:0009617)	477	43	11.19	+	3.84	1.39e-09	regulation of multi-organism process (GO:0043900)	280	49	22.59	+	2.17	0.0106	response to acid chemical (GO:0001101)	1126	112	52.24	+	2.14	1.89e-09
response to biotic stimulus (GO:0009607)	1022	85	23.97	+	3.55	2.89e-19	regulation of response to biotic stimulus (GO:0002831)	184	44	14.85	+	2.96	1.4e-05	response to alcohol (GO:0097305)	528	49	24.5	+	2	0.0396
response to chemical (GO:0042221)	2661	165	62.41	+	2.64	8.78e-27	regulation of response to external stimulus (GO:0032101)	189	44	15.25	+	2.89	2.78e-05	response to biotic stimulus (GO:0009607)	1022	96	47.42	+	2.02	1.88e-06
response to chitin (GO:0010200)	137	26	3.21	+	8.09	2.03e-11	regulation of response to stimulus (GO:0048583)	691	95	55.75	+	1.7	0.00955	response to cadmium ion (GO:0046686)	343	41	15.91	+	2.58	0.000661
response to decreased oxygen levels (GO:0036293)	263	34	6.17	+	5.51	4.14e-11	regulation of response to stress (GO:0080134)	374	68	30.18	+	2.25	3.81e-05	response to chemical (GO:0042221)	2661	239	123.46	+	1.94	3.3e-18
response to drug (GO:0042493)	501	51	11.75	+	4.34	9.28e-14	response to abiotic stimulus (GO:0009628)	2062	227	166.37	+	1.36	0.0208	response to chitin (GO:0010200)	137	21	6.36	+	3.3	0.0197
response to endogenous stimulus (GO:0009719)	1378	75	32.32	+	2.32	1.48e-07	response to acid chemical (GO:0001101)	1126	138	90.85	+	1.52	0.0184	response to drug (GO:0042493)	501	50	23.24	+	2.15	0.00494
response to endoplasmic reticulum stress (GO:0034976)	97	12	2.27	+	5.27	0.0216	response to antibiotic (GO:0046677)	286	54	23.08	+	2.34	0.000347	response to endogenous stimulus (GO:0009719)	1378	133	63.93	+	2.08	9.88e-11
response to external biotic stimulus (GO:0043207)	1021	85	23.95	+	3.55	2.73e-19	response to bacterium (GO:0009617)	477	109	38.49	+	2.83	1.4e-15	response to ethylene (GO:0009723)	206	28	9.56	+	2.93	0.00539
response to external stimulus (GO:0009605)	1424	95	33.4	+	2.84	1.19e-15	response to biotic stimulus (GO:0009607)	1022	203	82.46	+	2.46	3.4e-24	response to external biotic stimulus (GO:0043207)	1021	95	47.37	+	2.01	3.15e-06
response to fungus (GO:0009620)	321	37	7.53	+	4.91	7.24e-11	response to chemical (GO:0042221)	2661	356	214.7	+	1.66	1.03e-15	response to external stimulus (GO:0009605)	1424	120	66.07	+	1.82	6.48e-06
response to hormone (GO:0009725)	1360	74	31.9	+	2.32	2.08e-07	response to chitin (GO:0010200)	137	35	11.05	+	3.17	0.000126	response to fungus (GO:0009620)	321	36	14.89	+	2.42	0.0161
response to hypoxia (GO:0001666)	259	33	6.07	+	5.43	1.47e-10	response to decreased oxygen levels (GO:0036293)	263	67	21.22	+	3.16	1.24e-10	response to hormone (GO:0009725)	1360	126	63.1	+	2	6.12e-09
response to inorganic substance (GO:0010035)	892	43	20.92	+	2.06	0.0485	response to drug (GO:0042493)	501	96	40.42	+	2.37	2.3e-09	response to inorganic substance (GO:0010035)	892	85	41.39	+	2.05	8.48e-06
response to jasmonic acid (GO:0009753)	217	18	5.09	+	3.54	0.0252	response to external biotic stimulus (GO:0043207)	1021	203	82.38	+	2.46	3.17e-24	response to lipid (GO:0033993)	704	68	32.66	+	2.08	0.000289
response to lipid (GO:0033993)	704	41	16.51	+	2.48	0.00082	response to external stimulus (GO:0009605)	1424	246	114.89	+	2.14	4.59e-22	response to metal ion (GO:0010038)	456	49	21.16	+	2.32	0.000853
response to nitrogen compound (GO:1901698)	291	38	6.82	+	5.57	8.46e-13	response to fungus (GO:0009620)	321	58	25.9	+	2.24	0.000509	response to nitrogen compound (GO:1901698)	291	41	13.5	+	3.04	9.84e-06
response to organic cyclic compound (GO:0014070)	336	23	7.88	+	2.92	0.03	response to hydrogen peroxide (GO:0042542)	55	18	4.44	+	4.06	0.0138	response to organic cyclic compound (GO:0014070)	336	38	15.59	+	2.44	0.00747
response to organic substance (GO:0010033)	1712	111	40.15	+	2.76	5.73e-18	response to hypoxia (GO:0001666)	259	67	20.9	+	3.21	6.72e-11	response to organic substance (GO:0010033)	1712	160	79.43	+	2.01	1.93e-12
response to organonitrogen compound (GO:0010243)	242	36	5.68	+	6.34	1.33e-13	response to nitrogen compound (GO:1901698)	291	56	23.48	+	2.39	0.000126	response to organonitrogen compound (GO:0010243)	242	37	11.23	+	3.3	8.15e-06
response to other organism (GO:0051707)	1021	85	23.95	+	3.55	2.73e-19	response to oomycetes (GO:0002239)	87	27	7.02	+	3.85	0.000164	response to osmotic stress (GO:0006970)	545	51	25.29	+	2.02	0.0212
response to oxygen levels (GO:0070482)	264	34	6.19	+	5.49	4.57e-11	response to organic substance (GO:0010033)	1712	218	138.13	+	1.58	1.43e-06	response to other organism (GO:0051707)	1021	95	47.37	+	2.01	3.15e-06
response to oxygen-containing compound (GO:1901700)	1504	96	35.27	+	2.72	1.2e-14	response to organonitrogen compound (GO:0010243)	242	49	19.53	+	2.51	0.000309	response to oxygen-containing compound (GO:1901700)	1504	145	69.78	+	2.08	5.21e-12
response to salicylic acid (GO:0009751)	206	17	4.83	+	3.52	0.0471	response to other organism (GO:0051707)	1021	203	82.38	+	2.46	3.17e-24	response to stimulus (GO:0050896)	5327	412	247.15	+	1.67	4.9e-23
response to stimulus (GO:0050896)	5327	267	124.94	+	2.14	2.76e-33	response to oxygen levels (GO:0070482)	264	67	21.3	+	3.15	1.45e-10	response to stress (GO:0006950)	3079	241	142.85	+	1.69	1.43e-11
response to stress (GO:0006950)	3079	174	72.21	+	2.41	5.05e-24	response to oxygen-containing compound (GO:1901700)	1504	200	121.35	+	1.65	3.09e-07	response to wounding (GO:0009611)	207	28	9.6	+	2.92	0.00587
response to topologically incorrect protein (GO:0035966)	80	11	1.88	+	5.86	0.0208	response to stimulus (GO:0050896)	5327	673	429.8	+	1.57	1.11e-28	RNA metabolic process (GO:0016070)	1227	22	56.93	-	0.39	0.000624
RNA metabolic process (GO:0016070)	1227	6	28.78	-	0.21	0.00128	response to stress (GO:0006950)	3079	418	248.42	+	1.68	1.89e-20	RNA processing (GO:0006396)	756	9	35.08	-	0.26	0.00117
signal transduction (GO:0007165)	1300	73	30.49	+	2.39	7.24e-08	response to toxic substance (GO:0009636)	187	39	15.09	+	2.58	0.00333	root system development (GO:0022622)	473	46	21.95	+	2.1	0.0324
signaling (GO:0023052)	1334	73	31.29	+	2.33	2.48e-07	ribonucleoprotein complex biogenesis (GO:0022613)	422	11	34.05	-	0.32	0.0342	secondary metabolic process (GO:0019748)	317	38	14.71	+	2.58	0.00179
Unclassified (UNCLASSIFIED)	6685	116	156.79	-	0.74	0	ribosome biogenesis (GO:0042254)	351	5	28.32	-	0.18	0.00108	secondary metabolite biosynthetic process (GO:0044550)	147	26	6.82	+	3.81	0.000142
CHILD GO TERMS REPRESENTING HIERARCHICAL CATEGORIES							RNA metabolic process (GO:0016070)	1227	32	99	-	0.32	5.36e-11	signal transduction (GO:0007165)	1300	113	60.32	+	1.87	3.07e-06
cellular response to hormone stimulus (GO:0032870)	624	36	14.63	+	2.46	0.00547	RNA modification (GO:0009451)	357	5	28.8	-	0.17	0.000776	signaling (GO:0023052)	1334	113	61.89	+	1.83	1.55e-05
cellular response to hypoxia (GO:0071456)	234	29	5.49	+	5.28	9.37e-09	RNA processing (GO:0006396)	756	16	61	-	0.26	1e-07	small molecule biosynthetic process (GO:0044283)	601	54	27.88	+	1.94	0.035
cellular response to topologically incorrect protein (GO:0035967)	74	11	1.74	+	6.34	0.0106	rRNA metabolic process (GO:0016072)	242	3	19.53	-	0.15	0.0377	small molecule catabolic process (GO:0044282)	208	27	9.65	+	2.8	0.0176
defense response to bacterium (GO:0042742)	394	36	9.24	+	3.9	8.03e-08	signal transduction (GO:0007165)	1300	187	104.89	+	1.78	3.47e-09	small molecule metabolic process (GO:0044281)	1400	127	64.95	+	1.96	1.91e-08
defense response to fungus (GO:0050832)	244	25	5.72	+	4.37	1.06e-05	signaling (GO:0023052)	1334	188	107.63	+	1.75	1.33e-08	thioester metabolic process (GO:0035383)	42	11	1.95	+	5.64	0.0471
defense response, incompatible interaction (GO:0009814)	174	16	4.08	+	3.92	0.024	translation (GO:0006412)	431	8	34.77	-	0.23	0.000541	transport (GO:0006810)	2086	158	96.78	+	1.63	1.75e-05
leaf senescence (GO:0010150)	103	13	2.42	+	5.38	0.00745	transport (GO:0006810)	2086	241	168.3	+	1.43	0.000366	Unclassified (UNCLASSIFIED)	6685	252	310.16	-	0.81	0
plant-type hypersensitive response (GO:0009626)	57	12	1.34	+	8.98	0.00014	Unclassified (UNCLASSIFIED)	6685	510	539.36	-	0.95	0	vesicle-mediated transport (GO:0016192)	430	49	19.95	+	2.46	0.000175
protein autophosphorylation (GO:0046777)	183	17	4.29	+	3.96	0.0112	vesicle-mediated transport (GO:0016192)	430	70	34.69	+	2.02	0.00123	CHILD GO TERMS REPRESENTING HIERARCHICAL CATEGORIES
regulation of defense response (GO:0031347)	259	24	6.07	+	3.95	0.000128	CHILD GO TERMS REPRESENTING HIERARCHICAL CATEGORIES							acyl-CoA metabolic process (GO:0006637)	42	11	1.95	+	5.64	0.0471
regulation of jasmonic acid mediated signaling pathway (GO:2000022)	40	8	0.94	+	8.53	0.0337	cellular macromolecule localization (GO:0070727)	683	92	55.11	+	1.67	0.0308	aging (GO:0007568)	133	20	6.17	+	3.24	0.0415
regulation of response to external stimulus (GO:0032101)	189	19	4.43	+	4.29	0.00102	cellular response to hypoxia (GO:0071456)	234	65	18.88	+	3.44	9.85e-12	carboxylic acid catabolic process (GO:0046395)	133	22	6.17	+	3.57	0.00399
regulation of salicylic acid metabolic process (GO:0010337)	20	8	0.47	+	17.06	0.000416	defense response to bacterium (GO:0042742)	394	89	31.79	+	2.8	4.56e-12	cellular macromolecule catabolic process (GO:0044265)	718	67	33.31	+	2.01	0.00101
response to abscisic acid (GO:0009737)	524	34	12.29	+	2.77	0.000807	defense response to fungus (GO:0050832)	244	46	19.69	+	2.34	0.00378	cellular response to acid chemical (GO:0071229)	354	38	16.42	+	2.31	0.0254
response to chitin (GO:0010200)	137	26	3.21	+	8.09	2.03e-11	defense response to oomycetes (GO:0002229)	67	19	5.41	+	3.51	0.0423	cellular response to oxygen-containing compound (GO:1901701)	500	57	23.2	+	2.46	1.34e-05
response to endoplasmic reticulum stress (GO:0034976)	97	12	2.27	+	5.27	0.0216	defense response, incompatible interaction (GO:0009814)	174	36	14.04	+	2.56	0.0104	cellular response to stress (GO:0033554)	1139	94	52.85	+	1.78	0.000801
response to inorganic substance (GO:0010035)	892	43	20.92	+	2.06	0.0485	establishment of localization (GO:0051234)	2132	244	172.02	+	1.42	0.000602	endocytosis (GO:0006897)	58	15	2.69	+	5.57	0.00165
response to jasmonic acid (GO:0009753)	217	18	5.09	+	3.54	0.0252	indole-containing compound metabolic process (GO:0042430)	71	23	5.73	+	4.02	0.000819	ethylene-activated signaling pathway (GO:0009873)	95	18	4.41	+	4.08	0.00666
response to salicylic acid (GO:0009751)	206	17	4.83	+	3.52	0.0471	positive regulation of innate immune response (GO:0045089)	77	21	6.21	+	3.38	0.0255	fatty acid metabolic process (GO:0006631)	201	30	9.33	+	3.22	0.000397
signal transduction (GO:0007165)	1300	73	30.49	+	2.39	7.24e-08	protein phosphorylation (GO:0006468)	799	142	64.47	+	2.2	1.69e-12	innate immune response (GO:0045087)	300	37	13.92	+	2.66	0.00173
							recognition of pollen (GO:0048544)	39	15	3.15	+	4.77	0.0174	organic substance transport (GO:0071702)	1128	87	52.33	+	1.66	0.0335
							response to acid chemical (GO:0001101)	1126	138	90.85	+	1.52	0.0184	organonitrogen compound catabolic process (GO:1901565)	874	77	40.55	+	1.9	0.00097
							response to chitin (GO:0010200)	137	35	11.05	+	3.17	0.000126	oxidation-reduction process (GO:0055114)	971	78	45.05	+	1.73	0.0225
							response to hydrogen peroxide (GO:0042542)	55	18	4.44	+	4.06	0.0138	phenylpropanoid biosynthetic process (GO:0009699)	85	18	3.94	+	4.56	0.00165
							signal transduction (GO:0007165)	1300	187	104.89	+	1.78	3.47e-09	regulation of biological quality (GO:0065008)	1152	92	53.45	+	1.72	0.00542
							vesicle-mediated transport (GO:0016192)	430	70	34.69	+	2.02	0.00123	response to alcohol (GO:0097305)	528	49	24.5	+	2	0.0396
														response to cadmium ion (GO:0046686)	343	41	15.91	+	2.58	0.000661
														response to chitin (GO:0010200)	137	21	6.36	+	3.3	0.0197
														response to fungus (GO:0009620)	321	36	14.89	+	2.42	0.0161
														response to lipid (GO:0033993)	704	68	32.66	+	2.08	0.000289
														response to organic cyclic compound (GO:0014070)	336	38	15.59	+	2.44	0.00747
														response to osmotic stress (GO:0006970)	545	51	25.29	+	2.02	0.0212
														response to wounding (GO:0009611)	207	28	9.6	+	2.92	0.00587
														root system development (GO:0022622)	473	46	21.95	+	2.1	0.0324
														small molecule biosynthetic process (GO:0044283)	601	54	27.88	+	1.94	0.035

## Sheet: O157H7_Down_4 HPI
Dataset S10. Overrepresented gene ontology terms from up and downregulated genes that overlap between Arabidopsis and lettuce plants inoculated with 1 x 109 CFU/mL of Escherichia coli O157:H7 or Salmonella enterica Typhimurium 14028s at 4 and 24 hours post inoculation (HPI).
Shared							Arabidopsis Specific							Lettuce Specific
ALL GO TERMS							ALL GO TERMS							ALL GO TERMS
Analysis Type:	PANTHER Overrepresentation Test (Released 20190711)						Analysis Type:	PANTHER Overrepresentation Test (Released 20190711)						Analysis Type:	PANTHER Overrepresentation Test (Released 20190711)
Annotation Version and Release Date:	GO Ontology database Released 2019-12-09						Annotation Version and Release Date:	GO Ontology database Released 2019-12-09						Annotation Version and Release Date:	GO Ontology database Released 2019-12-09
Analyzed List:	upload_1 (Arabidopsis thaliana)						Analyzed List:	upload_1 (Arabidopsis thaliana)						Analyzed List:	upload_1 (Arabidopsis thaliana)
Reference List:	Arabidopsis thaliana (all genes in database)						Reference List:	Arabidopsis thaliana (all genes in database)						Reference List:	Arabidopsis thaliana (all genes in database)
Test Type:	FISHER						Test Type:	FISHER						Test Type:	FISHER
Correction:	BONFERRONI						Correction:	BONFERRONI						Correction:	BONFERRONI
Bonferroni count:	2757						Bonferroni count:	2757						Bonferroni count:	2757
GO biological process complete	Arabidopsis thaliana - REFLIST (27416)	upload_1 (192)	upload_1 (expected)	upload_1 (over/under)	upload_1 (fold Enrichment)	upload_1 (P-value)	GO biological process complete	Arabidopsis thaliana - REFLIST (27416)	upload_1 (1942)	upload_1 (expected)	upload_1 (over/under)	upload_1 (fold Enrichment)	upload_1 (P-value)	GO biological process complete	Arabidopsis thaliana - REFLIST (27416)	upload_1 (534)	upload_1 (expected)	upload_1 (over/under)	upload_1 (fold Enrichment)	upload_1 (P-value)
photosynthetic electron transport chain (GO:0009767)	40	5	0.28	+	17.85	0.0415	alpha-amino acid biosynthetic process (GO:1901607)	162	30	11.48	+	2.61	0.0326	biosynthetic process (GO:0009058)	2441	80	47.55	+	1.68	0.0165
photosynthesis, light reaction (GO:0019684)	122	14	0.85	+	16.39	2.14e-09	biosynthetic process (GO:0009058)	2441	248	172.91	+	1.43	0.000154	carbon fixation (GO:0015977)	17	6	0.33	+	18.12	0.00998
photosynthesis (GO:0015979)	177	15	1.24	+	12.1	1.81e-08	carboxylic acid biosynthetic process (GO:0046394)	441	69	31.24	+	2.21	4.06e-05	cellular metabolic process (GO:0044237)	6800	186	132.45	+	1.4	0.000849
circadian rhythm (GO:0007623)	109	7	0.76	+	9.17	0.0478	carboxylic acid metabolic process (GO:0019752)	825	105	58.44	+	1.8	0.000248	cellular process (GO:0009987)	10043	264	195.61	+	1.35	6.84e-06
generation of precursor metabolites and energy (GO:0006091)	338	15	2.37	+	6.34	8.22e-05	cellular amino acid biosynthetic process (GO:0008652)	185	33	13.1	+	2.52	0.0211	chlorophyll biosynthetic process (GO:0015995)	37	8	0.72	+	11.1	0.00538
plastid organization (GO:0009657)	298	12	2.09	+	5.75	0.00547	cellular biosynthetic process (GO:0044249)	2262	226	160.23	+	1.41	0.00208	chlorophyll metabolic process (GO:0015994)	57	9	1.11	+	8.11	0.0123
Unclassified (UNCLASSIFIED)	6685	52	46.82	+	1.11	0	chloroplast organization (GO:0009658)	228	54	16.15	+	3.34	3.66e-09	cofactor metabolic process (GO:0051186)	416	24	8.1	+	2.96	0.0139
CHILD GO TERMS REPRESENTING HIERARCHICAL CATEGORIES							metabolic process (GO:0008152)	7731	653	547.62	+	1.19	0.00124	electron transport chain (GO:0022900)	94	12	1.83	+	6.55	0.00249
photosynthetic electron transport chain (GO:0009767)	40	5	0.28	+	17.85	0.0415	organic acid biosynthetic process (GO:0016053)	441	69	31.24	+	2.21	4.06e-05	generation of precursor metabolites and energy (GO:0006091)	338	34	6.58	+	5.16	1.62e-10
circadian rhythm (GO:0007623)	109	7	0.76	+	9.17	0.0478	organic acid metabolic process (GO:0006082)	956	113	67.72	+	1.67	0.00235	metabolic process (GO:0008152)	7731	220	150.58	+	1.46	6.32e-07
plastid organization (GO:0009657)	298	12	2.09	+	5.75	0.00547	organic substance biosynthetic process (GO:1901576)	2296	229	162.64	+	1.41	0.00198	organic substance biosynthetic process (GO:1901576)	2296	75	44.72	+	1.68	0.0392
							oxoacid metabolic process (GO:0043436)	949	112	67.22	+	1.67	0.00296	organic substance metabolic process (GO:0071704)	6774	179	131.94	+	1.36	0.0175
							plastid organization (GO:0009657)	298	67	21.11	+	3.17	6.33e-11	oxidation-reduction process (GO:0055114)	971	46	18.91	+	2.43	0.000324
							small molecule biosynthetic process (GO:0044283)	601	94	42.57	+	2.21	1.06e-07	photosynthesis (GO:0015979)	177	39	3.45	+	11.31	4.01e-23
							small molecule metabolic process (GO:0044281)	1400	164	99.17	+	1.65	1.04e-05	photosynthesis, light harvesting (GO:0009765)	44	14	0.86	+	16.34	9.44e-09
							Unclassified (UNCLASSIFIED)	6685	453	473.53	-	0.96	0	photosynthesis, light harvesting in photosystem I (GO:0009768)	23	11	0.45	+	24.55	5.93e-08
							vesicle-mediated transport (GO:0016192)	430	9	30.46	-	0.3	0.0447	photosynthesis, light reaction (GO:0019684)	122	29	2.38	+	12.2	2.11e-17
							CHILD GO TERMS REPRESENTING HIERARCHICAL CATEGORIES							photosynthetic electron transport chain (GO:0009767)	40	11	0.78	+	14.12	7.36e-06
							alpha-amino acid biosynthetic process (GO:1901607)	162	30	11.48	+	2.61	0.0326	pigment biosynthetic process (GO:0046148)	101	13	1.97	+	6.61	0.000805
							chloroplast organization (GO:0009658)	228	54	16.15	+	3.34	3.66e-09	pigment metabolic process (GO:0042440)	123	14	2.4	+	5.84	0.00111
														porphyrin-containing compound biosynthetic process (GO:0006779)	46	8	0.9	+	8.93	0.0223
														porphyrin-containing compound metabolic process (GO:0006778)	69	9	1.34	+	6.7	0.0495
														protein-chromophore linkage (GO:0018298)	28	11	0.55	+	20.17	3.18e-07
														reductive pentose-phosphate cycle (GO:0019253)	13	5	0.25	+	19.75	0.048
														regulation of biological quality (GO:0065008)	1152	49	22.44	+	2.18	0.002
														regulation of generation of precursor metabolites and energy (GO:0043467)	30	7	0.58	+	11.98	0.0154
														regulation of photosynthesis (GO:0010109)	41	8	0.8	+	10.02	0.0105
														response to abiotic stimulus (GO:0009628)	2062	95	40.16	+	2.37	4.33e-11
														response to biotic stimulus (GO:0009607)	1022	42	19.91	+	2.11	0.028
														response to chemical (GO:0042221)	2661	91	51.83	+	1.76	0.000591
														response to external biotic stimulus (GO:0043207)	1021	42	19.89	+	2.11	0.0275
														response to external stimulus (GO:0009605)	1424	54	27.74	+	1.95	0.0148
														response to high light intensity (GO:0009644)	63	10	1.23	+	8.15	0.00347
														response to light intensity (GO:0009642)	142	19	2.77	+	6.87	8.32e-07
														response to light stimulus (GO:0009416)	680	57	13.24	+	4.3	9.14e-16
														response to other organism (GO:0051707)	1021	42	19.89	+	2.11	0.0275
														response to oxygen-containing compound (GO:1901700)	1504	55	29.29	+	1.88	0.039
														response to radiation (GO:0009314)	705	57	13.73	+	4.15	4.28e-15
														response to stimulus (GO:0050896)	5327	182	103.76	+	1.75	1.12e-11
														response to stress (GO:0006950)	3079	102	59.97	+	1.7	0.000373
														small molecule metabolic process (GO:0044281)	1400	58	27.27	+	2.13	0.000506
														tetrapyrrole biosynthetic process (GO:0033014)	50	8	0.97	+	8.21	0.0385
														Unclassified (UNCLASSIFIED)	6685	114	130.21	-	0.88	0
														vitamin biosynthetic process (GO:0009110)	64	9	1.25	+	7.22	0.0287
														CHILD GO TERMS REPRESENTING HIERARCHICAL CATEGORIES
														chlorophyll biosynthetic process (GO:0015995)	37	8	0.72	+	11.1	0.00538
														photosynthesis, light harvesting in photosystem I (GO:0009768)	23	11	0.45	+	24.55	5.93e-08
														photosynthetic electron transport chain (GO:0009767)	40	11	0.78	+	14.12	7.36e-06
														protein-chromophore linkage (GO:0018298)	28	11	0.55	+	20.17	3.18e-07
														reductive pentose-phosphate cycle (GO:0019253)	13	5	0.25	+	19.75	0.048
														regulation of biological quality (GO:0065008)	1152	49	22.44	+	2.18	0.002
														regulation of generation of precursor metabolites and energy (GO:0043467)	30	7	0.58	+	11.98	0.0154
														regulation of photosynthesis (GO:0010109)	41	8	0.8	+	10.02	0.0105
														response to light intensity (GO:0009642)	142	19	2.77	+	6.87	8.32e-07
														response to stress (GO:0006950)	3079	102	59.97	+	1.7	0.000373
														vitamin biosynthetic process (GO:0009110)	64	9	1.25	+	7.22	0.0287

## Sheet: O157H7_Down_24 HPI
Dataset S10. Overrepresented gene ontology terms from up and downregulated genes that overlap between Arabidopsis and lettuce plants inoculated with 1 x 109 CFU/mL of Escherichia coli O157:H7 or Salmonella enterica Typhimurium 14028s at 4 and 24 hours post inoculation (HPI).
Shared							Arabidopsis Specific							Lettuce Specific
ALL GO TERMS							ALL GO TERMS							ALL GO TERMS
Analysis Type:	PANTHER Overrepresentation Test (Released 20190711)						Analysis Type:	PANTHER Overrepresentation Test (Released 20190711)						Analysis Type:	PANTHER Overrepresentation Test (Released 20190711)
Annotation Version and Release Date:	GO Ontology database Released 2019-12-09						Annotation Version and Release Date:	GO Ontology database Released 2019-12-09						Annotation Version and Release Date:	GO Ontology database Released 2019-12-09
Analyzed List:	upload_1 (Arabidopsis thaliana)						Analyzed List:	upload_1 (Arabidopsis thaliana)						Analyzed List:	upload_1 (Arabidopsis thaliana)
Reference List:	Arabidopsis thaliana (all genes in database)						Reference List:	Arabidopsis thaliana (all genes in database)						Reference List:	Arabidopsis thaliana (all genes in database)
Test Type:	FISHER						Test Type:	FISHER						Test Type:	FISHER
Correction:	BONFERRONI						Correction:	BONFERRONI						Correction:	BONFERRONI
Bonferroni count:	2757						Bonferroni count:	2757						Bonferroni count:	2757
GO biological process complete	Arabidopsis thaliana - REFLIST (27416)	upload_1 (122)	upload_1 (expected)	upload_1 (over/under)	upload_1 (fold Enrichment)	upload_1 (P-value)	GO biological process complete	Arabidopsis thaliana - REFLIST (27416)	upload_1 (2086)	upload_1 (expected)	upload_1 (over/under)	upload_1 (fold Enrichment)	upload_1 (P-value)	GO biological process complete	Arabidopsis thaliana - REFLIST (27416)	upload_1 (285)	upload_1 (expected)	upload_1 (over/under)	upload_1 (fold Enrichment)	upload_1 (P-value)
pattern specification process (GO:0007389)	184	8	0.82	+	9.77	0.0065	chloroplast organization (GO:0009658)	228	49	17.35	+	2.82	1.04e-05	response to light stimulus (GO:0009416)	680	24	7.07	+	3.4	0.000963
response to auxin (GO:0009733)	310	10	1.38	+	7.25	0.0047	plastid organization (GO:0009657)	298	59	22.67	+	2.6	2.81e-06	response to radiation (GO:0009314)	705	24	7.33	+	3.27	0.00179
shoot system development (GO:0048367)	739	14	3.29	+	4.26	0.0179	small molecule biosynthetic process (GO:0044283)	601	99	45.73	+	2.16	1.08e-07	response to acid chemical (GO:0001101)	1126	30	11.71	+	2.56	0.00984
system development (GO:0048731)	1809	23	8.05	+	2.86	0.0139	organic acid biosynthetic process (GO:0016053)	441	69	33.55	+	2.06	0.000541	response to oxygen-containing compound (GO:1901700)	1504	35	15.63	+	2.24	0.0306
Unclassified (UNCLASSIFIED)	6685	17	29.75	-	0.57	0	carboxylic acid biosynthetic process (GO:0046394)	441	69	33.55	+	2.06	0.000541	response to abiotic stimulus (GO:0009628)	2062	47	21.44	+	2.19	0.00127
CHILD GO TERMS REPRESENTING HIERARCHICAL CATEGORIES							carboxylic acid metabolic process (GO:0019752)	825	110	62.77	+	1.75	0.000468	Unclassified (UNCLASSIFIED)	6685	79	69.49	+	1.14	0
pattern specification process (GO:0007389)	184	8	0.82	+	9.77	0.0065	organic acid metabolic process (GO:0006082)	956	125	72.74	+	1.72	0.000163	CHILD GO TERMS REPRESENTING HIERARCHICAL CATEGORIES
response to auxin (GO:0009733)	310	10	1.38	+	7.25	0.0047	oxoacid metabolic process (GO:0043436)	949	124	72.21	+	1.72	0.000152	response to light stimulus (GO:0009416)	680	24	7.07	+	3.4	0.000963
shoot system development (GO:0048367)	739	14	3.29	+	4.26	0.0179	small molecule metabolic process (GO:0044281)	1400	175	106.52	+	1.64	5.47e-06	response to acid chemical (GO:0001101)	1126	30	11.71	+	2.56	0.00984
							organic substance biosynthetic process (GO:1901576)	2296	252	174.7	+	1.44	7.71e-05	response to oxygen-containing compound (GO:1901700)	1504	35	15.63	+	2.24	0.0306
							biosynthetic process (GO:0009058)	2441	264	185.73	+	1.42	0.000115
							cellular biosynthetic process (GO:0044249)	2262	239	172.11	+	1.39	0.00318
							Unclassified (UNCLASSIFIED)	6685	503	508.64	-	0.99	0
							cellular macromolecule catabolic process (GO:0044265)	718	24	54.63	-	0.44	0.0229
							ubiquitin-dependent protein catabolic process (GO:0006511)	480	11	36.52	-	0.3	0.00802
							modification-dependent protein catabolic process (GO:0019941)	493	11	37.51	-	0.29	0.00303
							modification-dependent macromolecule catabolic process (GO:0043632)	505	11	38.42	-	0.29	0.00162
							mRNA metabolic process (GO:0016071)	434	9	33.02	-	0.27	0.00638
							CHILD GO TERMS REPRESENTING HIERARCHICAL CATEGORIES
							chloroplast organization (GO:0009658)	228	49	17.35	+	2.82	1.04e-05
							carboxylic acid biosynthetic process (GO:0046394)	441	69	33.55	+	2.06	0.000541

## Sheet: STm 14028s_Down_4 HPI
Dataset S10. Overrepresented gene ontology terms from up and downregulated genes that overlap between Arabidopsis and lettuce plants inoculated with 1 x 109 CFU/mL of Escherichia coli O157:H7 or Salmonella enterica Typhimurium 14028s at 4 and 24 hours post inoculation (HPI).
Shared							Arabidopsis Specific							Lettuce Specific
ALL GO TERMS							ALL GO TERMS							ALL GO TERMS
Analysis Type:	PANTHER Overrepresentation Test (Released 20190711)						Analysis Type:	PANTHER Overrepresentation Test (Released 20190711)						Analysis Type:	PANTHER Overrepresentation Test (Released 20190711)
Annotation Version and Release Date:	GO Ontology database Released 2019-12-09						Annotation Version and Release Date:	GO Ontology database Released 2019-12-09						Annotation Version and Release Date:	GO Ontology database Released 2019-12-09
Analyzed List:	upload_1 (Arabidopsis thaliana)						Analyzed List:	upload_1 (Arabidopsis thaliana)						Analyzed List:	upload_1 (Arabidopsis thaliana)
Reference List:	Arabidopsis thaliana (all genes in database)						Reference List:	Arabidopsis thaliana (all genes in database)						Reference List:	Arabidopsis thaliana (all genes in database)
Test Type:	FISHER						Test Type:	FISHER						Test Type:	FISHER
Correction:	BONFERRONI						Correction:	BONFERRONI						Correction:	BONFERRONI
Bonferroni count:	2757						Bonferroni count:	2757						Bonferroni count:	2757
GO biological process complete	Arabidopsis thaliana - REFLIST (27416)	upload_1 (298)	upload_1 (expected)	upload_1 (over/under)	upload_1 (fold Enrichment)	upload_1 (P-value)	GO biological process complete	Arabidopsis thaliana - REFLIST (27416)	upload_1 (1552)	upload_1 (expected)	upload_1 (over/under)	upload_1 (fold Enrichment)	upload_1 (P-value)	GO biological process complete	Arabidopsis thaliana - REFLIST (27416)	upload_1 (1069)	upload_1 (expected)	upload_1 (over/under)	upload_1 (fold Enrichment)	upload_1 (P-value)
photosynthetic electron transport chain (GO:0009767)	40	6	0.43	+	13.8	0.0264	chloroplast organization (GO:0009658)	228	36	12.91	+	2.79	0.000732	cellular metabolic process (GO:0044237)	6800	340	265.14	+	1.28	0.00124
photosynthesis, light reaction (GO:0019684)	122	12	1.33	+	9.05	6.92e-05	plastid organization (GO:0009657)	298	46	16.87	+	2.73	4.6e-05	cellular process (GO:0009987)	10043	492	391.59	+	1.26	2.12e-06
circadian rhythm (GO:0007623)	109	9	1.18	+	7.6	0.0151	methylation (GO:0032259)	321	42	18.17	+	2.31	0.00804	chlorophyll biosynthetic process (GO:0015995)	37	10	1.44	+	6.93	0.0214
rhythmic process (GO:0048511)	122	9	1.33	+	6.79	0.0353	organic acid biosynthetic process (GO:0016053)	441	50	24.96	+	2	0.0452	chlorophyll metabolic process (GO:0015994)	57	13	2.22	+	5.85	0.00489
photosynthesis (GO:0015979)	177	13	1.92	+	6.76	0.000443	carboxylic acid biosynthetic process (GO:0046394)	441	50	24.96	+	2	0.0452	cofactor metabolic process (GO:0051186)	416	39	16.22	+	2.4	0.00597
chloroplast organization (GO:0009658)	228	15	2.48	+	6.05	0.000192	small molecule biosynthetic process (GO:0044283)	601	66	34.02	+	1.94	0.00536	drug metabolic process (GO:0017144)	400	36	15.6	+	2.31	0.0293
plastid organization (GO:0009657)	298	18	3.24	+	5.56	3.24e-05	Unclassified (UNCLASSIFIED)	6685	376	378.43	-	0.99	0	fluid transport (GO:0042044)	29	9	1.13	+	7.96	0.024
generation of precursor metabolites and energy (GO:0006091)	338	15	3.67	+	4.08	0.0208	CHILD GO TERMS REPRESENTING HIERARCHICAL CATEGORIES							generation of precursor metabolites and energy (GO:0006091)	338	46	13.18	+	3.49	1.24e-08
response to light stimulus (GO:0009416)	680	24	7.39	+	3.25	0.00214	chloroplast organization (GO:0009658)	228	36	12.91	+	2.79	0.000732	lipid metabolic process (GO:0006629)	728	57	28.39	+	2.01	0.00623
response to radiation (GO:0009314)	705	24	7.66	+	3.13	0.00394	methylation (GO:0032259)	321	42	18.17	+	2.31	0.00804	metabolic process (GO:0008152)	7731	406	301.45	+	1.35	3.95e-08
Unclassified (UNCLASSIFIED)	6685	69	72.66	-	0.95	0	carboxylic acid biosynthetic process (GO:0046394)	441	50	24.96	+	2	0.0452	nucleic acid metabolic process (GO:0090304)	1629	31	63.52	-	0.49	0.0203
CHILD GO TERMS REPRESENTING HIERARCHICAL CATEGORIES														organic cyclic compound biosynthetic process (GO:1901362)	762	58	29.71	+	1.95	0.0109
photosynthetic electron transport chain (GO:0009767)	40	6	0.43	+	13.8	0.0264								organic substance metabolic process (GO:0071704)	6774	335	264.13	+	1.27	0.00439
circadian rhythm (GO:0007623)	109	9	1.18	+	7.6	0.0151								organonitrogen compound metabolic process (GO:1901564)	3927	206	153.12	+	1.35	0.0381
chloroplast organization (GO:0009658)	228	15	2.48	+	6.05	0.000192								oxidation-reduction process (GO:0055114)	971	76	37.86	+	2.01	0.000128
response to light stimulus (GO:0009416)	680	24	7.39	+	3.25	0.00214								photosynthesis (GO:0015979)	177	49	6.9	+	7.1	3.07e-20
														photosynthesis, light harvesting (GO:0009765)	44	17	1.72	+	9.91	1.6e-07
														photosynthesis, light harvesting in photosystem I (GO:0009768)	23	12	0.9	+	13.38	7.6e-06
														photosynthesis, light reaction (GO:0019684)	122	37	4.76	+	7.78	7.21e-16
														photosynthetic electron transport chain (GO:0009767)	40	12	1.56	+	7.69	0.00104
														photosystem II assembly (GO:0010207)	25	9	0.97	+	9.23	0.00885
														pigment metabolic process (GO:0042440)	123	18	4.8	+	3.75	0.0164
														porphyrin-containing compound metabolic process (GO:0006778)	69	14	2.69	+	5.2	0.00659
														protein-chromophore linkage (GO:0018298)	28	13	1.09	+	11.91	4.98e-06
														regulation of photosynthesis (GO:0010109)	41	11	1.6	+	6.88	0.00801
														regulation of stomatal movement (GO:0010119)	86	15	3.35	+	4.47	0.015
														response to abiotic stimulus (GO:0009628)	2062	155	80.4	+	1.93	8.29e-11
														response to biotic stimulus (GO:0009607)	1022	77	39.85	+	1.93	0.000434
														response to blue light (GO:0009637)	93	17	3.63	+	4.69	0.00204
														response to external biotic stimulus (GO:0043207)	1021	77	39.81	+	1.93	0.000425
														response to external stimulus (GO:0009605)	1424	107	55.52	+	1.93	1.37e-06
														response to far red light (GO:0010218)	51	12	1.99	+	6.03	0.00922
														response to high light intensity (GO:0009644)	63	13	2.46	+	5.29	0.0128
														response to light intensity (GO:0009642)	142	25	5.54	+	4.52	1.06e-05
														response to light stimulus (GO:0009416)	680	80	26.51	+	3.02	2.65e-13
														response to other organism (GO:0051707)	1021	77	39.81	+	1.93	0.000425
														response to radiation (GO:0009314)	705	80	27.49	+	2.91	1.67e-12
														response to red light (GO:0010114)	71	14	2.77	+	5.06	0.00883
														response to red or far red light (GO:0009639)	197	24	7.68	+	3.12	0.00928
														response to stimulus (GO:0050896)	5327	310	207.71	+	1.49	5.19e-10
														response to stress (GO:0006950)	3079	175	120.06	+	1.46	0.00238
														small molecule metabolic process (GO:0044281)	1400	96	54.59	+	1.76	0.000756
														tetrapyrrole biosynthetic process (GO:0033014)	50	11	1.95	+	5.64	0.0407
														tetrapyrrole metabolic process (GO:0033013)	72	14	2.81	+	4.99	0.0102
														Unclassified (UNCLASSIFIED)	6685	223	260.66	-	0.86	0
														water transport (GO:0006833)	29	9	1.13	+	7.96	0.024
														CHILD GO TERMS REPRESENTING HIERARCHICAL CATEGORIES
														chlorophyll biosynthetic process (GO:0015995)	37	10	1.44	+	6.93	0.0214
														drug metabolic process (GO:0017144)	400	36	15.6	+	2.31	0.0293
														lipid metabolic process (GO:0006629)	728	57	28.39	+	2.01	0.00623
														photosynthesis, light harvesting in photosystem I (GO:0009768)	23	12	0.9	+	13.38	7.6e-06
														photosynthetic electron transport chain (GO:0009767)	40	12	1.56	+	7.69	0.00104
														photosystem II assembly (GO:0010207)	25	9	0.97	+	9.23	0.00885
														protein-chromophore linkage (GO:0018298)	28	13	1.09	+	11.91	4.98e-06
														regulation of photosynthesis (GO:0010109)	41	11	1.6	+	6.88	0.00801
														regulation of stomatal movement (GO:0010119)	86	15	3.35	+	4.47	0.015
														response to blue light (GO:0009637)	93	17	3.63	+	4.69	0.00204
														response to light intensity (GO:0009642)	142	25	5.54	+	4.52	1.06e-05
														response to other organism (GO:0051707)	1021	77	39.81	+	1.93	0.000425
														response to red light (GO:0010114)	71	14	2.77	+	5.06	0.00883
														response to red or far red light (GO:0009639)	197	24	7.68	+	3.12	0.00928
														response to stress (GO:0006950)	3079	175	120.06	+	1.46	0.00238
														small molecule metabolic process (GO:0044281)	1400	96	54.59	+	1.76	0.000756
														water transport (GO:0006833)	29	9	1.13	+	7.96	0.024

## Sheet: STm 14028s_Down_24 HPI
Dataset S10. Overrepresented gene ontology terms from up and downregulated genes that overlap between Arabidopsis and lettuce plants inoculated with 1 x 109 CFU/mL of Escherichia coli O157:H7 or Salmonella enterica Typhimurium 14028s at 4 and 24 hours post inoculation (HPI).
Shared							Arabidopsis Specific							Lettuce Specific
ALL GO TERMS							ALL GO TERMS							ALL GO TERMS
Analysis Type:	PANTHER Overrepresentation Test (Released 20190711)						Analysis Type:	PANTHER Overrepresentation Test (Released 20190711)						Analysis Type:	PANTHER Overrepresentation Test (Released 20190711)
Annotation Version and Release Date:	GO Ontology database Released 2019-12-09						Annotation Version and Release Date:	GO Ontology database Released 2019-12-09						Annotation Version and Release Date:	GO Ontology database Released 2019-12-09
Analyzed List:	upload_1 (Arabidopsis thaliana)						Analyzed List:	upload_1 (Arabidopsis thaliana)						Analyzed List:	upload_1 (Arabidopsis thaliana)
Reference List:	Arabidopsis thaliana (all genes in database)						Reference List:	Arabidopsis thaliana (all genes in database)						Reference List:	Arabidopsis thaliana (all genes in database)
Test Type:	FISHER						Test Type:	FISHER						Test Type:	FISHER
Correction:	BONFERRONI						Correction:	BONFERRONI						Correction:	BONFERRONI
Bonferroni count:	2757						Bonferroni count:	2757						Bonferroni count:	2757
GO biological process complete	Arabidopsis thaliana - REFLIST (27416)	upload_1 (480)	upload_1 (expected)	upload_1 (over/under)	upload_1 (fold Enrichment)	upload_1 (P-value)	GO biological process complete	Arabidopsis thaliana - REFLIST (27416)	upload_1 (2226)	upload_1 (expected)	upload_1 (over/under)	upload_1 (fold Enrichment)	upload_1 (P-value)	GO biological process complete	Arabidopsis thaliana - REFLIST (27416)	upload_1 (1268)	upload_1 (expected)	upload_1 (over/under)	upload_1 (fold Enrichment)	upload_1 (P-value)
chloroplast RNA processing (GO:0031425)	21	6	0.37	+	16.32	0.0151	amide transport (GO:0042886)	728	28	59.11	-	0.47	0.0487	anatomical structure development (GO:0048856)	2885	187	133.43	+	1.4	0.0139
photosynthesis, light reaction (GO:0019684)	122	17	2.14	+	7.96	8.43e-07	biosynthetic process (GO:0009058)	2441	300	198.19	+	1.51	2.9e-08	biological regulation (GO:0065007)	5644	343	261.04	+	1.31	0.000202
photosynthesis (GO:0015979)	177	20	3.1	+	6.45	6.85e-07	carboxylic acid biosynthetic process (GO:0046394)	441	78	35.81	+	2.18	1.08e-05	cellular aromatic compound metabolic process (GO:0006725)	2380	188	110.08	+	1.71	1.01e-08
chloroplast organization (GO:0009658)	228	24	3.99	+	6.01	4.25e-08	carboxylic acid metabolic process (GO:0019752)	825	127	66.98	+	1.9	7.18e-07	cellular component organization or biogenesis (GO:0071840)	2822	186	130.52	+	1.43	0.00563
plastid organization (GO:0009657)	298	28	5.22	+	5.37	1.04e-08	cellular biosynthetic process (GO:0044249)	2262	273	183.66	+	1.49	1.86e-06	cellular metabolic process (GO:0044237)	6800	447	314.5	+	1.42	1.9e-12
generation of precursor metabolites and energy (GO:0006091)	338	20	5.92	+	3.38	0.0131	cellular macromolecule catabolic process (GO:0044265)	718	24	58.3	-	0.41	0.00261	cellular nitrogen compound metabolic process (GO:0034641)	2671	188	123.53	+	1.52	6.38e-05
response to light stimulus (GO:0009416)	680	32	11.91	+	2.69	0.00261	cellular protein catabolic process (GO:0044257)	593	18	48.15	-	0.37	0.00505	cellular process (GO:0009987)	10043	636	464.49	+	1.37	3.16e-18
response to radiation (GO:0009314)	705	32	12.34	+	2.59	0.00544	chloroplast organization (GO:0009658)	228	50	18.51	+	2.7	1.98e-05	chloroplast organization (GO:0009658)	228	29	10.55	+	2.75	0.011
Unclassified (UNCLASSIFIED)	6685	97	117.04	-	0.83	0	establishment of protein localization (GO:0045184)	701	26	56.92	-	0.46	0.0333	circadian rhythm (GO:0007623)	109	19	5.04	+	3.77	0.00997
CHILD GO TERMS REPRESENTING HIERARCHICAL CATEGORIES							fatty acid metabolic process (GO:0006631)	201	38	16.32	+	2.33	0.0292	developmental process (GO:0032502)	3065	194	141.76	+	1.37	0.0369
chloroplast RNA processing (GO:0031425)	21	6	0.37	+	16.32	0.0151	modification-dependent macromolecule catabolic process (GO:0043632)	505	13	41	-	0.32	0.00339	developmental process involved in reproduction (GO:0003006)	1413	103	65.35	+	1.58	0.0421
photosynthesis, light reaction (GO:0019684)	122	17	2.14	+	7.96	8.43e-07	modification-dependent protein catabolic process (GO:0019941)	493	12	40.03	-	0.3	0.00241	gene expression (GO:0010467)	1403	115	64.89	+	1.77	4.85e-05
chloroplast organization (GO:0009658)	228	24	3.99	+	6.01	4.25e-08	monocarboxylic acid biosynthetic process (GO:0072330)	206	39	16.73	+	2.33	0.0214	generation of precursor metabolites and energy (GO:0006091)	338	39	15.63	+	2.49	0.00251
response to light stimulus (GO:0009416)	680	32	11.91	+	2.69	0.00261	monocarboxylic acid metabolic process (GO:0032787)	423	67	34.34	+	1.95	0.00627	heterocycle metabolic process (GO:0046483)	2256	183	104.34	+	1.75	2.95e-09
							organic acid biosynthetic process (GO:0016053)	441	78	35.81	+	2.18	1.08e-05	macromolecule metabolic process (GO:0043170)	4696	323	217.19	+	1.49	8.31e-10
							organic acid metabolic process (GO:0006082)	956	145	77.62	+	1.87	7.88e-08	macromolecule modification (GO:0043412)	2295	171	106.14	+	1.61	8.33e-06
							organic substance biosynthetic process (GO:1901576)	2296	284	186.42	+	1.52	6.77e-08	metabolic process (GO:0008152)	7731	502	357.56	+	1.4	4.51e-14
							oxoacid metabolic process (GO:0043436)	949	143	77.05	+	1.86	1.52e-07	multicellular organism development (GO:0007275)	2528	168	116.92	+	1.44	0.0122
							peptide transport (GO:0015833)	712	26	57.81	-	0.45	0.0199	multicellular organismal process (GO:0032501)	2775	186	128.34	+	1.45	0.00229
							plastid organization (GO:0009657)	298	65	24.2	+	2.69	1.68e-07	ncRNA metabolic process (GO:0034660)	407	52	18.82	+	2.76	1.67e-06
							protein catabolic process (GO:0030163)	675	23	54.81	-	0.42	0.00795	ncRNA processing (GO:0034470)	344	47	15.91	+	2.95	1.6e-06
							protein localization (GO:0008104)	789	30	64.06	-	0.47	0.0159	nitrogen compound metabolic process (GO:0006807)	5422	360	250.77	+	1.44	2.27e-09
							protein transport (GO:0015031)	692	26	56.19	-	0.46	0.0424	nucleic acid metabolic process (GO:0090304)	1629	144	75.34	+	1.91	2.94e-09
							proteolysis involved in cellular protein catabolic process (GO:0051603)	584	17	47.42	-	0.36	0.00283	nucleobase-containing compound metabolic process (GO:0006139)	1966	155	90.93	+	1.7	1.17e-06
							small molecule biosynthetic process (GO:0044283)	601	109	48.8	+	2.23	2.78e-09	organic cyclic compound metabolic process (GO:1901360)	2471	197	114.28	+	1.72	1.29e-09
							small molecule metabolic process (GO:0044281)	1400	202	113.67	+	1.78	4.67e-10	organic substance metabolic process (GO:0071704)	6774	446	313.3	+	1.42	1.37e-12
							sulfur compound biosynthetic process (GO:0044272)	134	30	10.88	+	2.76	0.0202	photosynthesis (GO:0015979)	177	35	8.19	+	4.28	4.66e-08
							ubiquitin-dependent protein catabolic process (GO:0006511)	480	12	38.97	-	0.31	0.00433	photosynthesis, light harvesting (GO:0009765)	44	12	2.04	+	5.9	0.0134
							Unclassified (UNCLASSIFIED)	6685	553	542.78	+	1.02	0	photosynthesis, light harvesting in photosystem I (GO:0009768)	23	10	1.06	+	9.4	0.00277
							vesicle-mediated transport (GO:0016192)	430	9	34.91	-	0.26	0.00168	photosynthesis, light reaction (GO:0019684)	122	27	5.64	+	4.79	1.11e-06
							CHILD GO TERMS REPRESENTING HIERARCHICAL CATEGORIES							plastid organization (GO:0009657)	298	39	13.78	+	2.83	0.00013
							chloroplast organization (GO:0009658)	228	50	18.51	+	2.7	1.98e-05	post-embryonic development (GO:0009791)	1458	113	67.43	+	1.68	0.000999
							fatty acid metabolic process (GO:0006631)	201	38	16.32	+	2.33	0.0292	primary metabolic process (GO:0044238)	6105	400	282.36	+	1.42	2.79e-10
							monocarboxylic acid biosynthetic process (GO:0072330)	206	39	16.73	+	2.33	0.0214	protein-chromophore linkage (GO:0018298)	28	12	1.3	+	9.27	0.000258
							sulfur compound biosynthetic process (GO:0044272)	134	30	10.88	+	2.76	0.0202	regulation of biological process (GO:0050789)	4941	302	228.52	+	1.32	0.00113
														reproductive structure development (GO:0048608)	1192	92	55.13	+	1.67	0.0151
														reproductive system development (GO:0061458)	1194	92	55.22	+	1.67	0.0155
														response to abiotic stimulus (GO:0009628)	2062	172	95.37	+	1.8	1.63e-09
														response to acid chemical (GO:0001101)	1126	93	52.08	+	1.79	0.000918
														response to chemical (GO:0042221)	2661	178	123.07	+	1.45	0.0039
														response to inorganic substance (GO:0010035)	892	74	41.26	+	1.79	0.0129
														response to light stimulus (GO:0009416)	680	68	31.45	+	2.16	5.97e-05
														response to oxygen-containing compound (GO:1901700)	1504	116	69.56	+	1.67	0.000773
														response to radiation (GO:0009314)	705	68	32.61	+	2.09	0.000283
														response to stimulus (GO:0050896)	5327	355	246.38	+	1.44	2.1e-09
														response to stress (GO:0006950)	3079	206	142.4	+	1.45	0.000529
														response to temperature stimulus (GO:0009266)	579	54	26.78	+	2.02	0.0136
														rhythmic process (GO:0048511)	122	19	5.64	+	3.37	0.0417
														ribosome biogenesis (GO:0042254)	351	37	16.23	+	2.28	0.0406
														RNA metabolic process (GO:0016070)	1227	118	56.75	+	2.08	3.09e-09
														RNA modification (GO:0009451)	357	38	16.51	+	2.3	0.0267
														RNA processing (GO:0006396)	756	79	34.97	+	2.26	5.75e-07
														rRNA metabolic process (GO:0016072)	242	30	11.19	+	2.68	0.012
														rRNA processing (GO:0006364)	236	30	10.92	+	2.75	0.0076
														system development (GO:0048731)	1809	132	83.67	+	1.58	0.00209
														tetrapyrrole biosynthetic process (GO:0033014)	50	12	2.31	+	5.19	0.0406
														Unclassified (UNCLASSIFIED)	6685	257	309.18	-	0.83	0
														CHILD GO TERMS REPRESENTING HIERARCHICAL CATEGORIES
														chloroplast organization (GO:0009658)	228	29	10.55	+	2.75	0.011
														circadian rhythm (GO:0007623)	109	19	5.04	+	3.77	0.00997
														photosynthesis, light harvesting in photosystem I (GO:0009768)	23	10	1.06	+	9.4	0.00277
														post-embryonic development (GO:0009791)	1458	113	67.43	+	1.68	0.000999
														protein-chromophore linkage (GO:0018298)	28	12	1.3	+	9.27	0.000258
														regulation of biological process (GO:0050789)	4941	302	228.52	+	1.32	0.00113
														reproductive structure development (GO:0048608)	1192	92	55.13	+	1.67	0.0151
														response to acid chemical (GO:0001101)	1126	93	52.08	+	1.79	0.000918
														response to inorganic substance (GO:0010035)	892	74	41.26	+	1.79	0.0129
														response to light stimulus (GO:0009416)	680	68	31.45	+	2.16	5.97e-05
														response to oxygen-containing compound (GO:1901700)	1504	116	69.56	+	1.67	0.000773
														response to stress (GO:0006950)	3079	206	142.4	+	1.45	0.000529
														response to temperature stimulus (GO:0009266)	579	54	26.78	+	2.02	0.0136
														RNA modification (GO:0009451)	357	38	16.51	+	2.3	0.0267
														rRNA processing (GO:0006364)	236	30	10.92	+	2.75	0.0076
														tetrapyrrole biosynthetic process (GO:0033014)	50	12	2.31	+	5.19	0.0406
